# Supplementary material for: Simultaneous generation of furfuryl alcohol, formate, and H2 by co-electrolysis of furfuryl and HCHO over bifunctional CuAg bimetallic electrocatalysts at ultra-low voltage
Source: Royal Society of Chemistry journal article supplement (doi:10.1039/d3ee03761d), 2023-12-22
Supplement: d3ee03761d1.pdf [file d3ee03761d1.pdf]

## *Supporting Information*

### **Simultaneous generation of furfuryl alcohol, formate and H<sub>2</sub> by co-electrolysis of furfuryl and HCHO over bifunctional CuAg bimetallic electrocatalysts at ultra-low voltage**

*Liang Zhao<sup>a</sup>, Zheng Lv<sup>a</sup>, Yue Shi<sup>a</sup>, Shuanglong Zhou<sup>a</sup>, Yan Liu<sup>a</sup>, Jiani Han<sup>a</sup>, Qi Zhang<sup>a</sup>, Jianping Lai<sup>a\*</sup> and Lei Wang<sup>a,b\*</sup>*

<sup>a</sup> *Key Laboratory of Eco-chemical Engineering, Ministry of Education, International Science and Technology Cooperation Base of Eco-chemical Engineering and Green Manufacturing, College of Chemistry and Molecular Engineering, Qingdao University of Science and Technology, Qingdao 266042, P.R. China.*

<sup>b</sup> *Shandong Engineering Research Center for Marine Environment Corrosion and Safety Protection, College of Environment and Safety Engineering, Qingdao University of Science and Technology, Qingdao 266042, P. R. China.*

**Chemicals and Materials.** Cu foam, Cu(NO<sub>3</sub>)<sub>2</sub>·3H<sub>2</sub>O (99%, Aladdin), AgNO<sub>3</sub> (99.99%, Sigma-Aldrich), Furfuryl (99.9%, Aladdin), Furfuryl alcohol (98%, Aladdin), HCHO (37%, Sigma-Aldrich), HCOOH (99%, Aladdin), HCl (37%, Aladdin), CH<sub>3</sub>OH (99.5%, Aladdin), CH<sub>3</sub>CH<sub>2</sub>OH (99.5%, Aladdin), NaOH (96%, Aladdin), DMSO (99.9%, Aladdin), D<sub>2</sub>O (99.9%, Aladdin). High pure Argon (99.999%) comes from Qingdao Deyi Gas Company. The deionized water (18 MΩ/cm) used in all experiments was prepared through ultrapure purification systems (Aqua Solutions).

## Electrocatalysts Synthesis

**Synthesis of Cu<sub>x</sub>Ag<sub>y</sub> electrocatalysts on Cu foam (Cu<sub>x</sub>Ag<sub>y</sub>/CF).** To avoid the introduction of other metal compounds, copper foam (1.0 cm×1.5 cm) was used as a catalyst carrier. The copper foam was washed sequentially (10 min each time) with 1.0 M HCl, deionized water, and CH<sub>3</sub>CH<sub>2</sub>OH. Cu<sub>x</sub>/Ag<sub>y</sub>-CF was synthesized by electrodeposition on the CHI 660 electrochemical workstation, which uses a three-electrode configuration with a Pt sheet and an Ag/AgCl electrode as counter and reference electrode respectively. Cu(NO<sub>3</sub>)<sub>2</sub>·3H<sub>2</sub>O (5 mM, 15 mM, 25 mM, 35 mM, 45 mM) and AgNO<sub>3</sub> (45 mM, 35 mM, 25 mM, 15 mM, 5 mM) were homogeneously mixed and dissolved in 20 mL of H<sub>2</sub>O. Electrodeposition at -0.3 V vs. AgCl for 600 s. Synthesize a series of electrocatalysts: Cu<sub>1</sub>Ag<sub>9</sub>/CF, Cu<sub>3</sub>Ag<sub>7</sub>/CF, Cu<sub>5</sub>Ag<sub>5</sub>/CF, Cu<sub>7</sub>Ag<sub>3</sub>/CF and Cu<sub>9</sub>Ag<sub>1</sub>/CF.

**Synthesis of Cu electrocatalysts on Cu foam (Cu/CF).** Cu(NO<sub>3</sub>)<sub>2</sub>·3H<sub>2</sub>O (25 mM) was dissolved in 20 mL of H<sub>2</sub>O. All experimental steps were the same as above.

**Synthesis of Ag electrocatalysts on Cu foam (Ag/CF).** AgNO<sub>3</sub> (25 mM) was dissolved in 20 mL of H<sub>2</sub>O. All experimental steps were the same as above.

**Characterization.** To study the morphology and structure of the catalyst, a Hitachi S-4800 scanning electron microscope (SEM) was tested. The morphology of the samples was characterized using transmission electron microscopy (TEM) and high resolution TEM (HRTEM) on a JEM-2100UHR with an accelerating voltage of 200 KV. X-ray diffraction (XRD) analysis at a scanning rate of 1°min<sup>-1</sup> in the 2θ ranges from 5 to 90° was used to examine the composition of the as-synthesized samples on X'Pert PRO MPD diffractometer (Netherlands PANalytical) operating at 40 KV and 40 mA with Cu Kα radiation. X-ray photoelectron spectra (XPS) were collected using a VG ESCALABMK II spectrometer. All the electrochemical properties of the samples were performed on an electrochemical station (CHI 660E). The content of elements is determined by inductively coupled plasma atomic emission spectrometer (ICP-AES, Varian 710-ES). H<sub>2</sub> evaporated by an electrolytic process is quantified by gas chromatography (GC 7900) equipped with a thermal conductivity detector (TCD) and a flame ionization detector (FID) and using Ar (99.999%) as the carrier gas. <sup>1</sup>H NMR spectra were recorded on a BRUKER AVANCE NEO 400 MHz liquid NMR spectrometer in the indicated solvents.

**Electrochemical Measurements.** On the CHI660 electrochemical workstation (Shanghai Zhenhua Instrument Corporation, Shanghai, China), electrochemical measurements were made in the conventional three-electrode trough with platinum wire as the opposite electrode and Hg/HgO electrode as the reference electrode. All electrochemical measurements were converted to RHE. All potentials measured in 1.0 M KOH and 0.05 M FF solution or 1.0 M KOH and 0.6 M HCHO solution were converted to values about RHE according to the equation:

$$E(\text{RHE}) = E(\text{SCE}) + 0.2415 \text{ V} + 0.0592 \times \text{pH}.$$

FF and HCHO (37 wt%) solutions were used directly as reducing and oxidation substrate, respectively. In addition, linear sweep voltammetry (LSV) was conducted at a scan rate of 5 mV/s. Electrochemical double layer capacitance ( $C_{dl}$ ) measurements were performed by cyclic voltammetry, collected at non-Faraday areas at different scan rates of 20 to 100 mV/s at potentials between 0.08 and 0.18 V vs. RHE in 1.0 M KOH and 0.05 MFF solution. Electrochemical impedance spectroscopy (EIS) was performed on the PAR-STAT 2273 test system with a frequency range of 100 kHz to 1 Hz with an AC signal amplitude of 10 mV, -0.3 V vs. RHE.

Two-electrode electrolysis was performed on an H-type electrochemical workstation with an anion exchange membrane. For the FOR/FEH two-electrode electrolytic cell,  $Cu_3Ag_7/CF$  was used for the anode and  $Cu_7Ag_3/CF$  for the cathode, including 1.0 M KOH and 0.6 M HCHO solution for the anode and 1.0 M KOH and 0.05 M FF solution for the cathode. Then, chronoamperometric tests were performed at different potentials, and Ar was continuously injected into the anode cell during the experiment. To analyze the gas products in the anode and cathode chambers, different cell voltages (from 0.3 to 0.7 V) were measured using  $Cu_3Ag_7/CF$  as the anode and  $Cu_7Ag_3/CF$  as the cathode in the two-electrode configuration. FE analysis of  $H_2$ , FA and FM production in the cathode and anode chambers was carried out from five consecutive 1 h controlled-current density electrolysis ( $500 \text{ mA cm}^{-2}$ ) using  $Cu_3Ag_7/CF$  and  $Cu_7Ag_3/CF$  couples, but with fresh electrolyte for each cycle.

**Measurement of ECSA.** To estimate ECSA values of the materials, double-layered capacitance ( $C_{dl}$ ) was measured using a simple cyclic voltammetry method. The potential was selected beyond the possible Faraday area (0.08 ~ 0.18 V vs. RHE) of the material to record the CV at different scan rates of 20 ~ 100 mV/s. The capacitive current density  $\Delta J/2$  was linearly correlated with the scan rate, and the double layer capacitance ( $C_{dl}$ ) was calculated from the slope of these straight lines. Using standard specific capacitance values for  $1.0 \text{ cm}^{-2}$  surfaces (~0.04 mF), the  $C_{dl}$  was further converted to ECSA.

$$ECSA = \frac{C_{dl}}{C_s}$$

$$C_s = 0.04 \text{ mF cm}^{-2}$$

**Calculation of turnover frequency.** Owing to the bulk nature of the catalysts, we selected an electrochemical method to obtain the TOF values of each sample. Nearly all the surface-active sites were assumed to be accessible by the electrolyte, and then the TOF values could be calculated by the following equation:

$$TOF = \frac{I}{4Fn}$$

where  $I$ ,  $n$ , and  $F$  are current during linear sweep measurement, the number of active site numbers, and the Faraday constant, respectively. The factor 1/4 is because electrolysis requires four electrons for the evolution of one hydrogen molecule from two protons and a FF from a FA. Value ( $n$ ), calculated from the CV data from the RHE in the range -0.3 V to +0.6 V in 1 M phosphate buffer (pH=7.4), with a scan rate of

50 mV/s. Since it is difficult to attribute the observed peak to a specific redox dual, the surface active site is almost linear with the integrated voltammetric charge (cathode and anode) on the CV curve. Assuming a one-electron process for both reduction and oxidation, we can evaluate the upper limit of the active site number according to the follow formula:

$$n = \frac{Q_{cv}}{2F}$$

**Product analysis.** Gas products were analyzed using gas chromatography (GC 7900) equipped with a thermal conductivity detector (TCD) and flame ionization detector (FID). Argon (99.99%) was used as a carrier gas. The quantity of H<sub>2</sub> production was determined via a water displacement method.

Liquid aliquots (0.5 mL) were taken before and after the preparative electrolysis experiments, diluted twice with acetonitrile, and analyzed using high performance liquid chromatography (HPLC), which was carried out on an Agilent Infinity 1260 II HPLC system (Agilent Technologies) equipped with a 220 nm UV-vis detector. The aliquots were fed through a Zorbax SB C-18 column (4.6×50mm, 3.5-micron, Agilent Technologies). FF and FA were quantified using HPLC by producing calibration curves. The mobile phase was V (acetonitrile) : V (water) = 50:50 at a flow rate of 1.0 mL/min with a detection wavelength of 220 nm and a column temperature of 25°C. FF and FA could be completely separated within 4 min.

HCHO concentration during electrolysis was quantified by UV-vis absorption measurements after the Hanke reaction. Ammonium acetate (15.4 g) was placed in water (50 mL), glacial acetic acid (0.3 mL) and acetylacetone (0.2 mL) and mixed with stirring to form a solution that was further diluted with water (49.5 mL). To determine the concentration of HCHO, 20.0 μL of the electrolyte was acidified with 20 μL of 2.0 M HCl acid and then diluted 2500 times before and after electrolysis. Subsequently, 2.0 mL of the diluted solution was mixed with acetylacetone solution (2.0 mL) and further heated to 60°C for 10 min. after cooling for 10 min, the absorbance of the sample solution was measured at 413 nm. Quantification of HCHO was obtained from the calibration curve by applying a pure HCHO standard solution of known concentration.

The identification and quantification of formic acid and methanol were determined from <sup>1</sup>H NMR using a calibration curve with DMSO (10.0 mM) as an internal standard. Before and after electrolysis 500 μL of electrolyte was acidified by 20 μL of HCl (37%) and then added to 100 μL of D<sub>2</sub>O. <sup>1</sup>H NMR was recorded using the water suppression method.

The Faradaic efficiency was calculated on the basis of the following equation:

$$FE (\%) = \frac{nF \times N}{Q_{\text{total charge passed}}} \times 100 \%$$

where  $n$  is the number of electrons transferred for each product molecule,  $F$  is Faraday's constant (96,485 C mol<sup>-1</sup>),  $N$  is the mole number of products and  $Q$  is the total passed charge.

FA conversion (%), product selectivity (%) and yield (%):

$$\text{Conversion (\%)} = \frac{\text{mole of furfural consumed}}{\text{mole of furfural initial}} \times 100 \%$$

$$\text{Selectivity (\%)} = \frac{\text{mole of furfuryl alcohol formed}}{\text{mole of furfural consumed}} \times 100 \%$$

$$\text{yield (\%)} = \frac{\text{mole of furfuryl alcohol formed}}{\text{mole of furfural initial}} \times 100 \%$$

The carbon balance (%) of the electrooxidation process was calculated using the following equation:

$$\text{carbon balance (\%)} = \frac{\text{mol of organic products}}{\text{mol of formaldehyde consumed}} \times 100 \%$$

The carbon balance (%) of the electroreduction process was calculated using the following equation:

$$\text{carbon balance (\%)} = \frac{n_{FF} + n_{FA}}{n_{FF}^0} \times 100 \%$$

The  $n_{FF}$ ,  $n_{FA}$  represents the mole amounts of FF and FA after the electrolysis. The  $n_{FF}^0$  represents the mole amount of FF before reaction.

**In-Situ Fourier Transform Infrared Spectroscopy (FTIR) Technique.** Operation process of silicon plane gold plating film: preparation of gold plating solution. Preparation solution A: dissolve 0.1222 g NaOH and 0.2286 g NaAuCl<sub>4</sub>·2H<sub>2</sub>O in 3 mL deionized water and dissolve by ultrasonic for 1 h; 0.134 g NH<sub>4</sub>Cl, 0.9468 g Na<sub>2</sub>SO<sub>3</sub> and 0.6202 g Na<sub>2</sub>S<sub>2</sub>O<sub>3</sub>·5H<sub>2</sub>O in 50 mL deionized water and sonicated for 1 h. Solution A was mixed with solution B, adding 50 mL of deionized water and fully sonicated for 2 h. Silicon crystal plating preparation: soak the silicon crystal in royal water (V (HCl): V (HNO<sub>3</sub>) = 3:1) for 30 min, and then rinse with deionized water. Secondly, grind 50 μm Al<sub>2</sub>O<sub>3</sub> powder on the electrode cloth in the clockwise direction of silicon crystal plating for 10 min, and then wash with deionized water. Third, deionized water and acetone were treated alternately 5 times, for 2 min, 1 min, 1 min, 1 min and 2 min respectively. Fourth, take out the oxidized solution (V (H<sub>2</sub>SO<sub>4</sub>): V (H<sub>2</sub>O<sub>2</sub>) = 3:1) and rinse with deionized water. Finally, the silicon coating was soaked in 40% NH<sub>4</sub>F solution for 4-5 min and rinsed with deionized water. Gold film deposition: put 15 mL gold plating solution into a 25 mL beaker, preheat in a 50-55°C water bath for 2 min, and then add 3.4 mL 2% HF. Secondly, the prepared silicon crystals were soaked in the above solution for 4-5 min, and finally washed with deionized water to obtain the gold plating layer.

**In-Situ Raman Technique.** The in situ Raman spectrum was obtained by using a specially designed electrolytic cell consisting of the bottom working electrode, platinum wire as the opposite electrode and the reference electrode. The electrode area was fixed to 1 cm<sup>2</sup>. A 60X objective confocal Raman microscope (inVia Qontor, Renishaw) was used. The laser wavelength used in all experiments was 532 nm. The signal acquisition time is 90 s for each Raman spectrum.

**AEM Electrolysis.** Before use, degrease and pretreat in 0.1 M HCl solution to remove contaminants from the oxide layer on the instrument surface. Then, clip the anion exchange membrane (Sustainion X37-50) between the cathode and anode catalyst to build an electrolytic cell (Cu<sub>3</sub>Ag<sub>7</sub>/CF(+)||Cu<sub>7</sub>Ag<sub>3</sub>/CF(-)). At room temperature, the cathode electrolyte (1.0 M KOH and 0.05 M FF solution) and the anode electrolyte

(1.0 M KOH and 0.6 M HCHO solution) were continuously supplied to both sides of the electrolytic cell with a circulating pump at a flow rate of 60 mL/min.

**Calculation Setup.** The framework for density functional theory implemented in the VASP program. The generalized gradient approximation proposed by Perdew, Burke, and Ernzerhof is selected for the exchange-correlation potential. The cut-off energy for plane wave is set to 500 eV. The energy criterion is set to  $10^{-5}$  eV in iterative solution of the Kohn-Sham equation. For all models the vacuum space along the z-direction was set to be 15 Å, which was enough to avoid interaction between the two neighboring images. The Brillouin zone integration is performed using a  $2 \times 2 \times 1$  k-mesh. All the structures are relaxed until the residual forces on the atoms have declined to less than 0.02 eV/Å. The Van der Waals dispersion-corrected DFT was also carried out, as proposed by Grimme et al. The barriers for transition states are calculated with the climbing-image nudged elastic band (CI-NEB) method. The free energy ( $\Delta G$ ) for elemental reaction step were calculated as:

$$\Delta G = \Delta E + \Delta E_{ZPE} - T\Delta S$$

where  $\Delta E$  is the difference between the total energy,  $\Delta E_{ZPE}$  and  $\Delta S$  are the differences in the zero-point energy and the change of entropy, T is the temperature (T = 300 K in this work), respectively.

## Figures

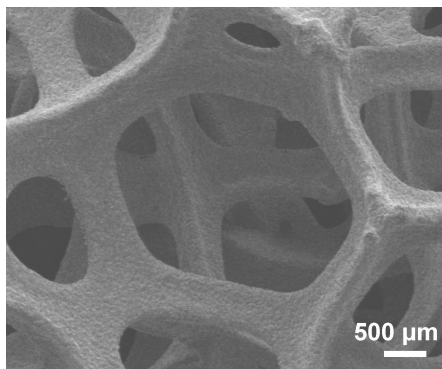

**Figure S1.** SEM image of treated copper foam.

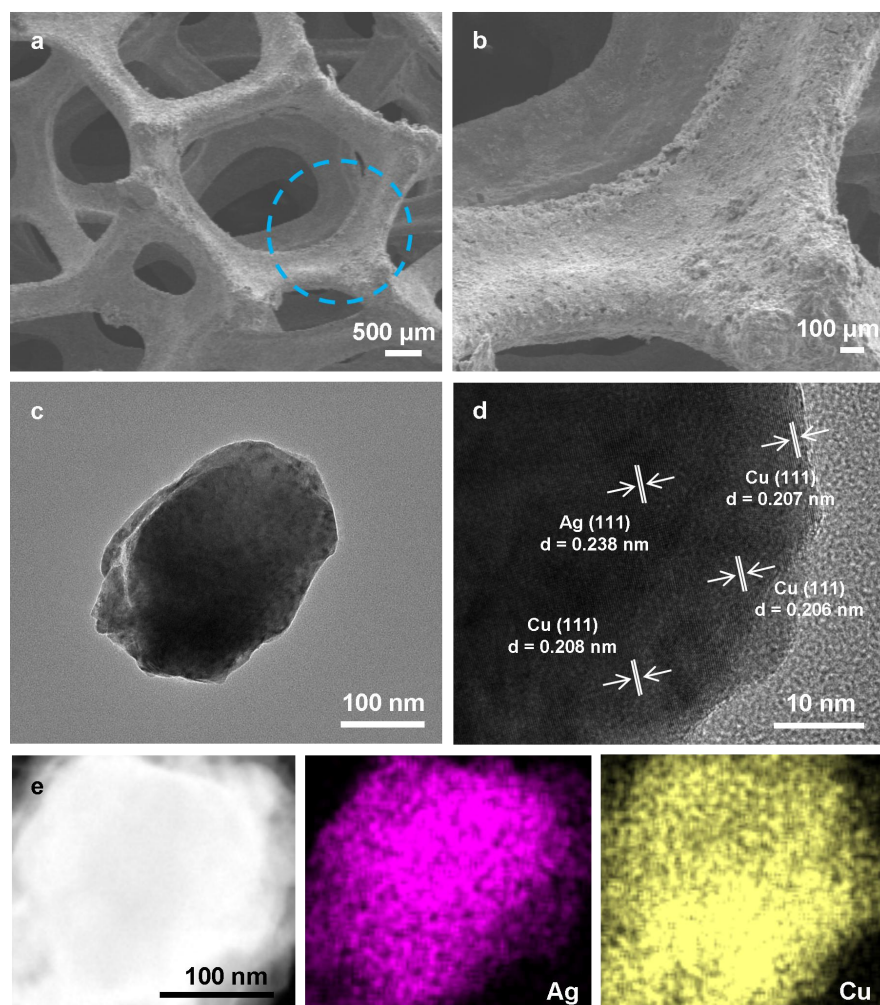

**Figure S2.** Morphology and elemental compositions of the  $\text{Cu}_3\text{Ag}_7/\text{CF}$  electrocatalysts. (a-b) SEM images. (c) TEM image. (d) HRTEM image. (e) STEM image and corresponding elemental mappings.

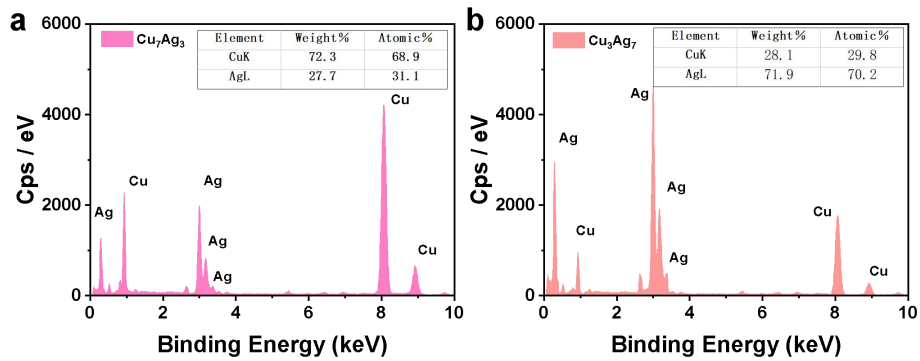

**Figure S3.** EDX spectroscopy analysis. (a)  $\text{Cu}_7\text{Ag}_3$ . (b)  $\text{Cu}_3\text{Ag}_7$ .

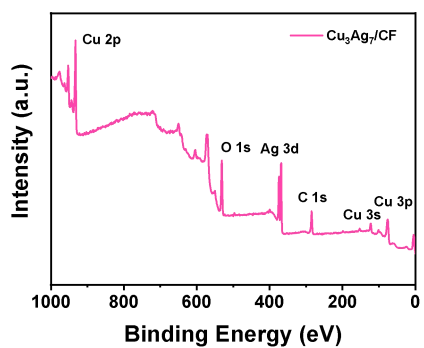

**Figure S4.** XPS survey spectra of  $\text{Cu}_3\text{Ag}_7/\text{CF}$ .

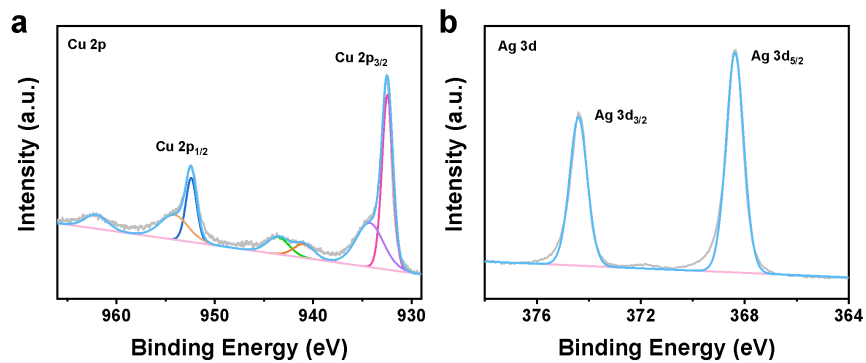

**Figure S5.** High-resolution XPS spectra of  $\text{Cu}_3\text{Ag}_7/\text{CF}$ . (a) Cu 2p. (b) Ag 3d.



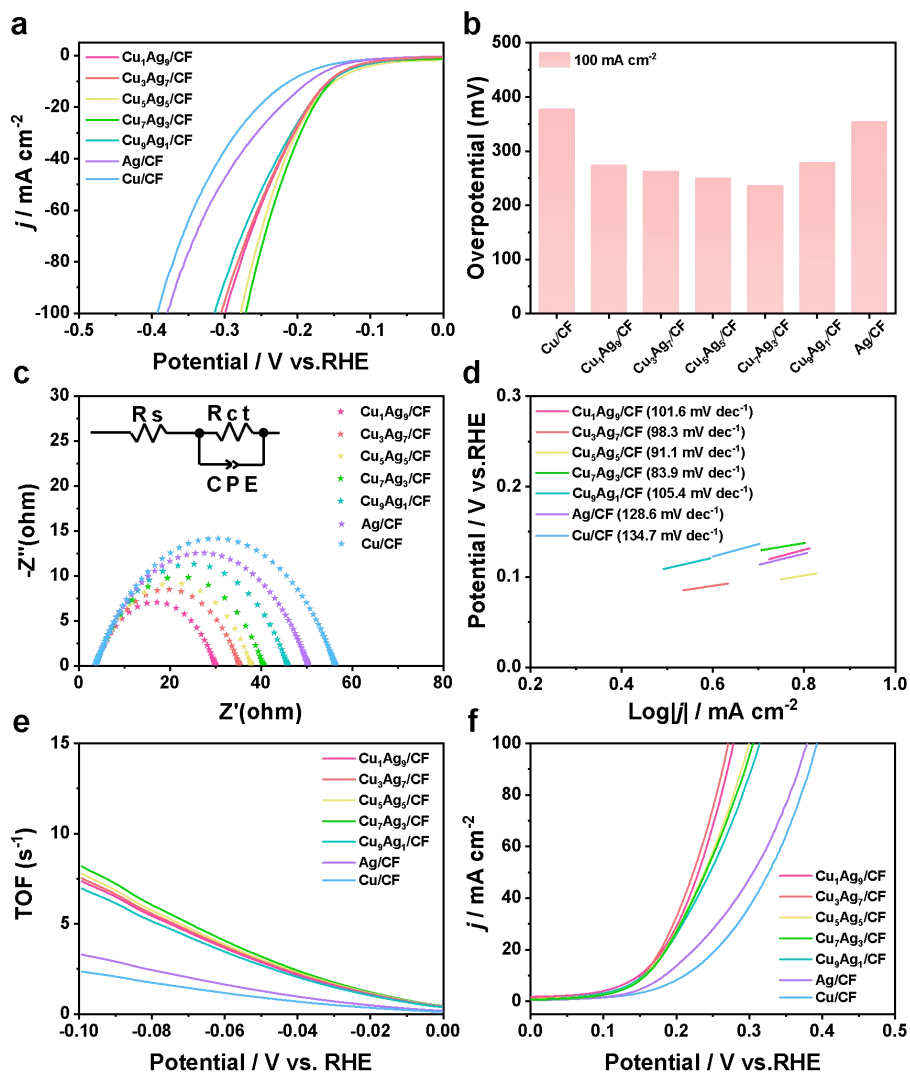

**Figure S6.** Electrochemical measurements of prepared catalysts. (a) LSV curves, (b) comparison of onset potentials at  $100 \text{ mA cm}^{-2}$ , (c) Nyquist plots, (d) Tafel slopes, (e) TOF curves in 1.0 M KOH and 0.05 M FF. (f) LSV curves in 1.0 M KOH and 0.6 M HCHO.

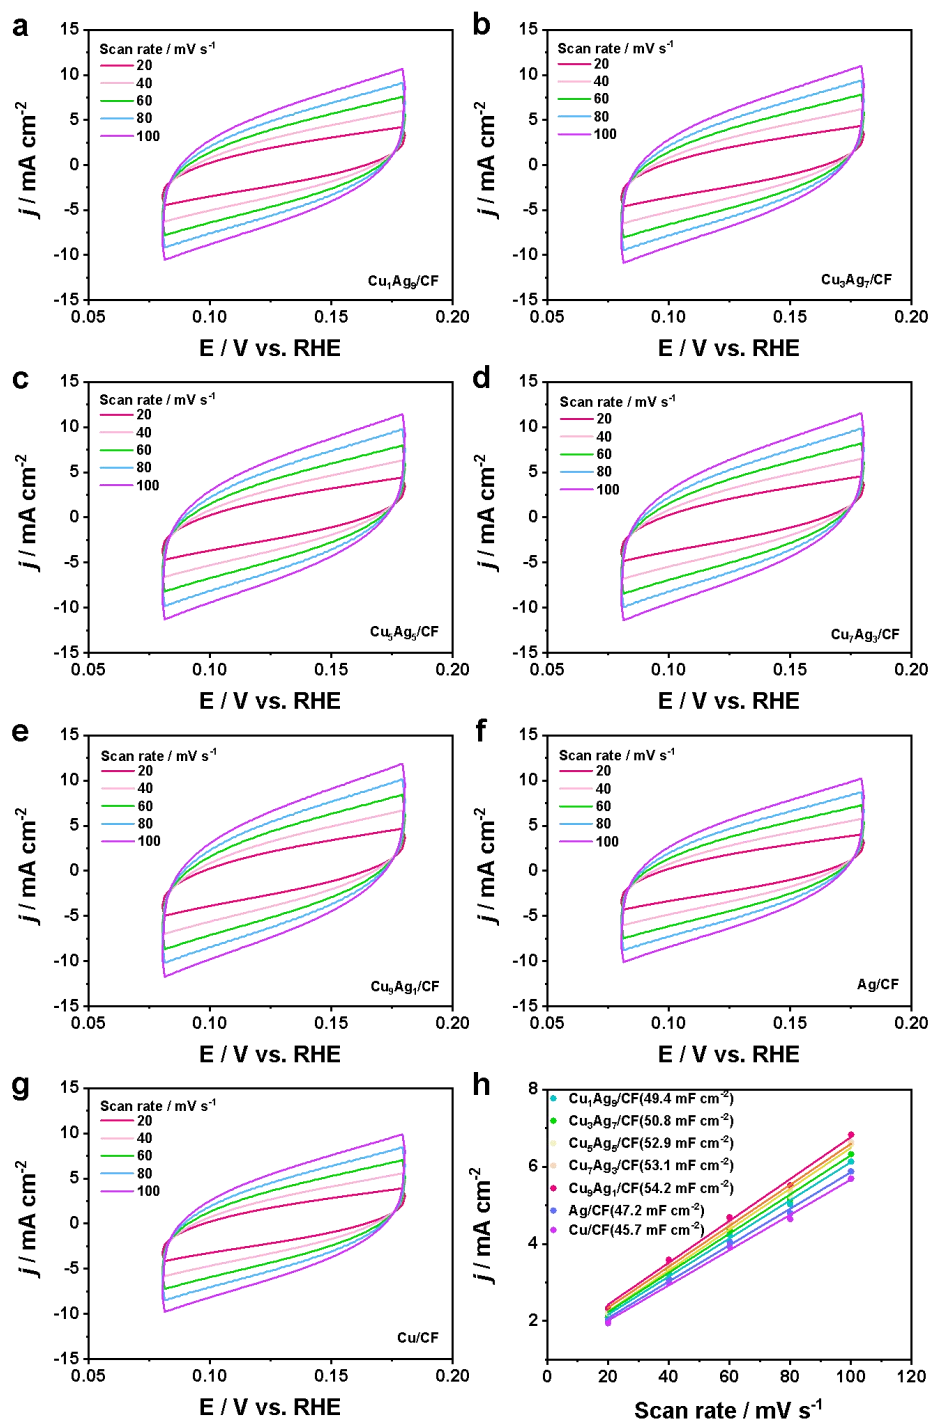

**Figure S7.** CV test. CV curves for the (a-e)  $\text{Cu}_x\text{Ag}_y/\text{CF}$ , (f)  $\text{Cu}/\text{CF}$ , and (g)  $\text{Ag}/\text{CF}$  were collected in a non-Faradaic region with various scan rates ranging from 20 to 100  $\text{mV s}^{-1}$  at potentials between 0.08 V and 0.18  $\text{V}_{\text{RHE}}$  in 1.0 M KOH. h)  $C_{dl}$  values of  $\text{Cu}/\text{CF}$ ,  $\text{Ag}/\text{CF}$ , and  $\text{Cu}_x\text{Ag}_{10-x}/\text{CF}$  based on corresponding CV curves.

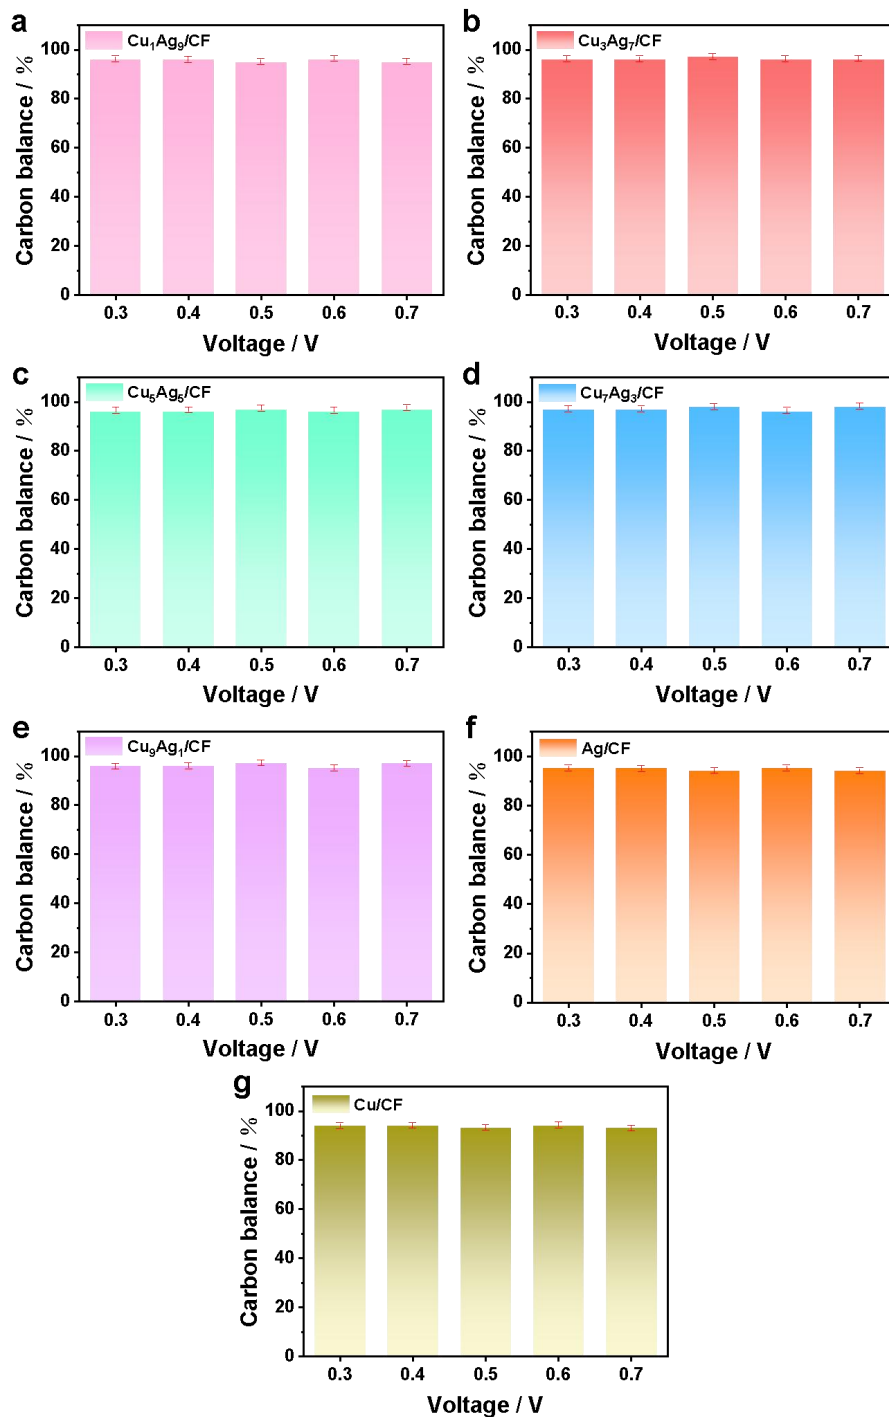

**Figure S8.** Carbon balance of FF electrolysis over different samples. (a)  $\text{Cu}_1\text{Ag}_9/\text{CF}$ , (b)  $\text{Cu}_3\text{Ag}_7/\text{CF}$ , (c)  $\text{Cu}_5\text{Ag}_5/\text{CF}$ , (d)  $\text{Cu}_7\text{Ag}_3/\text{CF}$ , (e)  $\text{Cu}_9\text{Ag}_1/\text{CF}$ , (f)  $\text{Ag}/\text{CF}$ , and (g)  $\text{Cu}/\text{CF}$ . Error bars represent the standard deviation from at least three independent measurements.

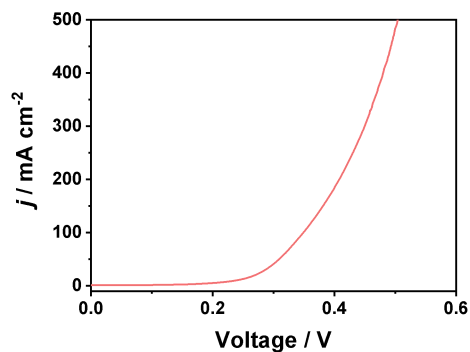

**Figure S9.** The two-electrode LSV curves for FOR/FEH.  $\text{Cu}_3\text{Ag}_7/\text{CF}$  and  $\text{Cu}_7\text{Ag}_3/\text{CF}$  were used as an anode and cathode, respectively. For anodic FEH, the solution was in 1.0 M KOH and 0.05 M FF; for anodic FOR, the solution was 1.0 M KOH and 0.6 M HCHO.

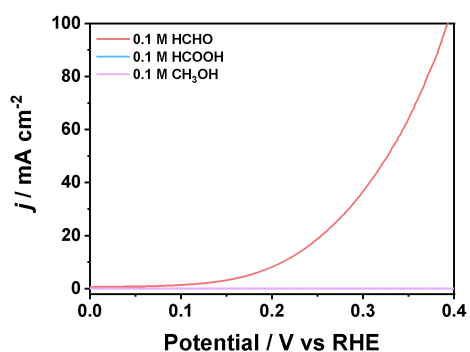

**Figure S10.** LSV curves for  $\text{Cu}_3\text{Ag}_7/\text{CF}$  after addition of 0.1 M HCOOH, 0.1 M  $\text{CH}_3\text{OH}$  and 0.1 M HCHO to 1.0 M KOH under Ar.

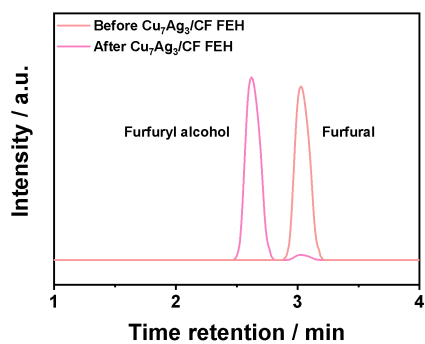

**Figure S11.** HPLC chromatogram of products before and after FEH for  $\text{Cu}_7\text{Ag}_3/\text{CF}$  at 0.5 V.

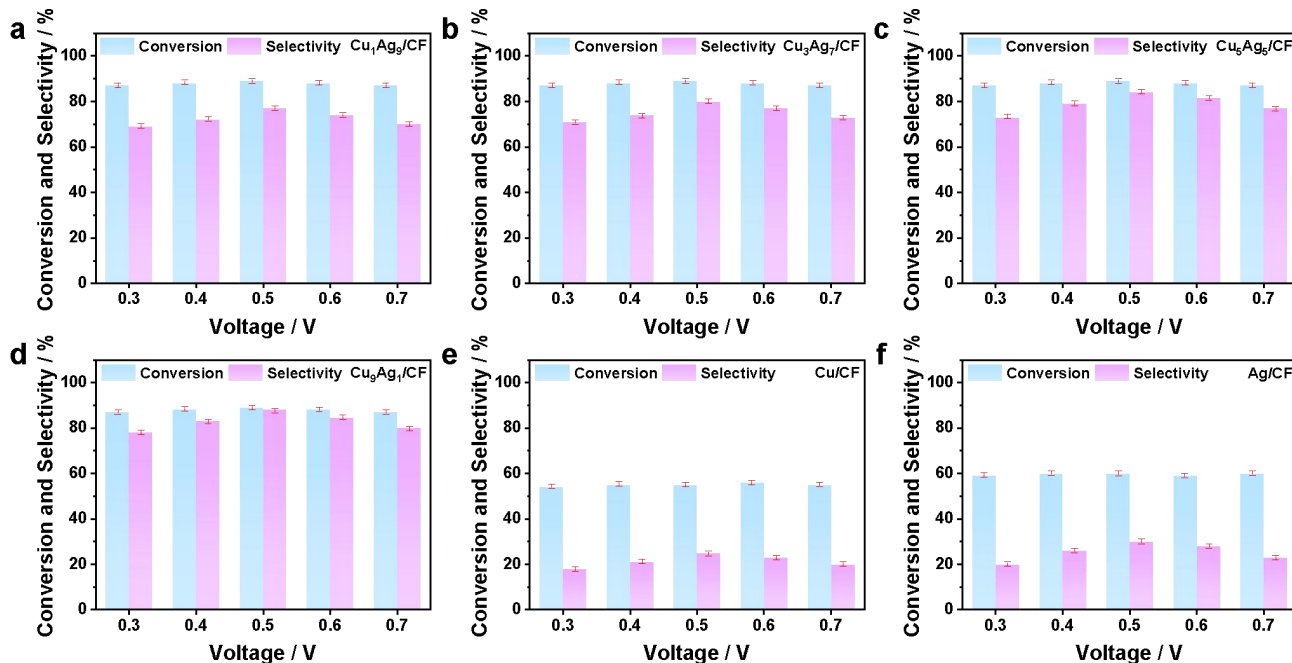

**Figure S12.** Conversion and selectivity of FEH for different samples. (a) Cu<sub>1</sub>Ag<sub>9</sub>/CF, (b) Cu<sub>3</sub>Ag<sub>7</sub>/CF, (c) Cu<sub>5</sub>Ag<sub>5</sub>/CF, (d) Cu<sub>9</sub>Ag<sub>1</sub>/CF, (e) Cu/CF and (f) Ag/CF. Error bars represent the standard deviation from at least three independent measurements.

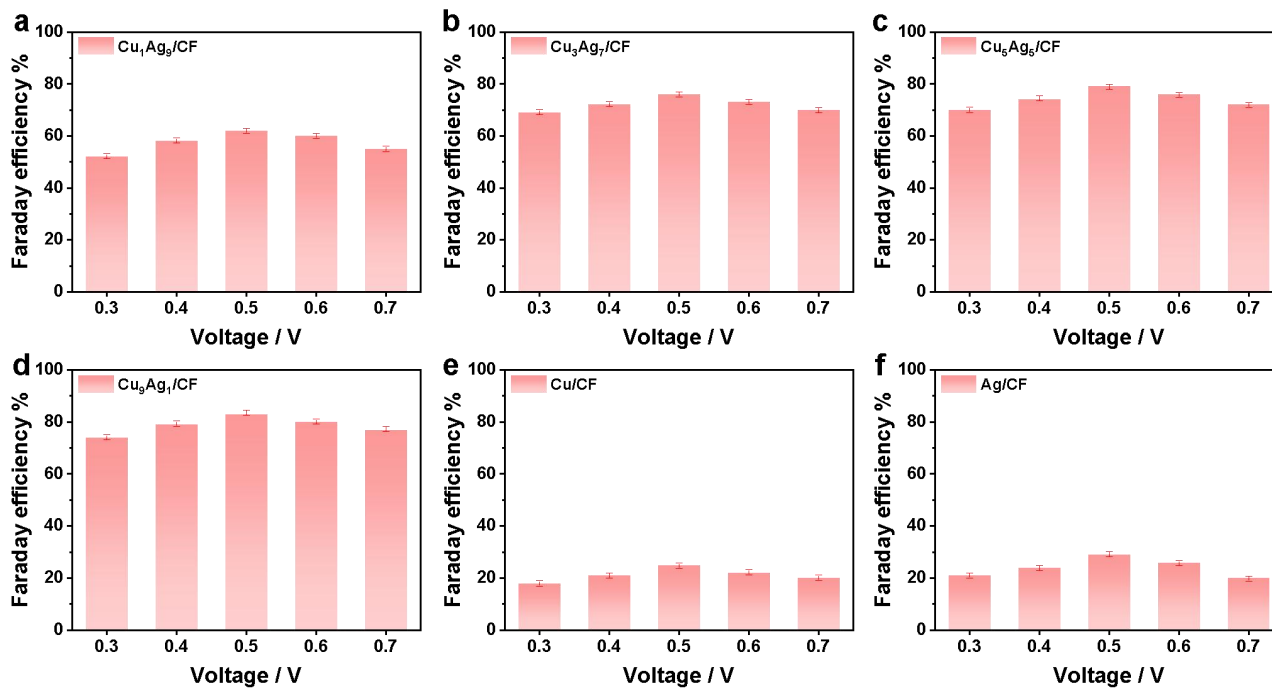

**Figure S13.** Faradaic efficiencies of FEH for different samples. (a) Cu<sub>1</sub>Ag<sub>9</sub>/CF, (b) Cu<sub>3</sub>Ag<sub>7</sub>/CF, (c) Cu<sub>5</sub>Ag<sub>5</sub>/CF, (d) Cu<sub>9</sub>Ag<sub>1</sub>/CF, (e) Cu/CF and (f) Ag/CF. Error bars represent the standard deviation from at least three independent measurements.

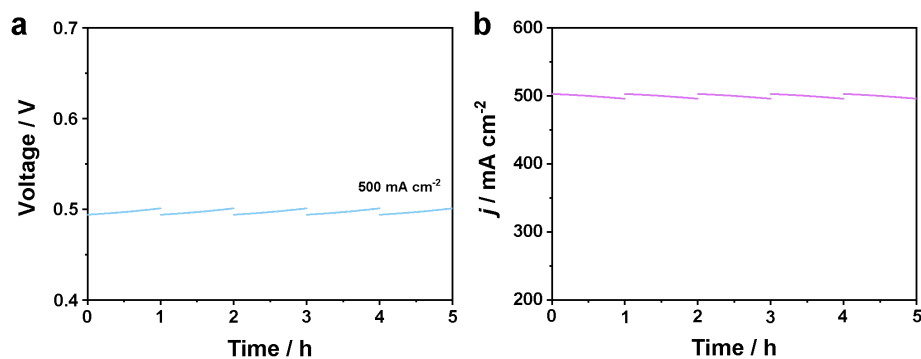

**Figure S14.** Stability testing of H-type cell. (a) Chronopotentiometric curves for five consecutive controlled-current density electrolysis cycles conducted at  $500 \text{ mA cm}^{-2}$ . (b) Fresh FF and HCHO were periodically replenished at a cell voltage of  $0.5 \text{ V}$  to bring it back to the original concentration of the solution.

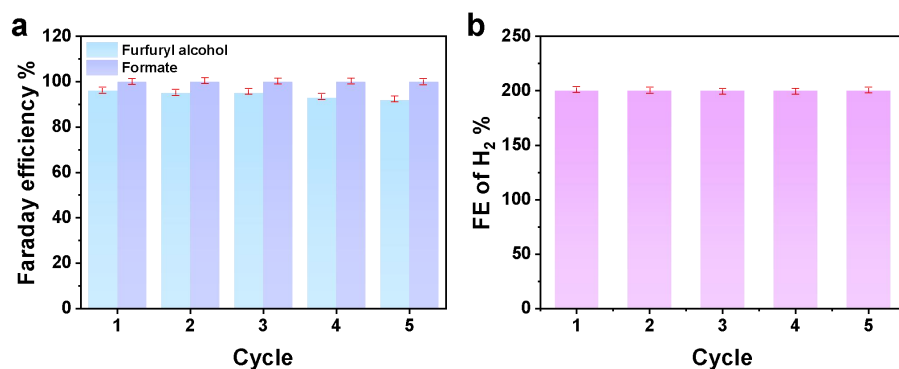

**Figure S15.** FE of (a) FA, FM and (b)  $\text{H}_2$  production for five consecutive  $1 \text{ h}$  controlled-current density ( $500 \text{ mA cm}^{-2}$ ) electrolysis cycles. Error bars represent the standard deviation from at least three independent measurements.

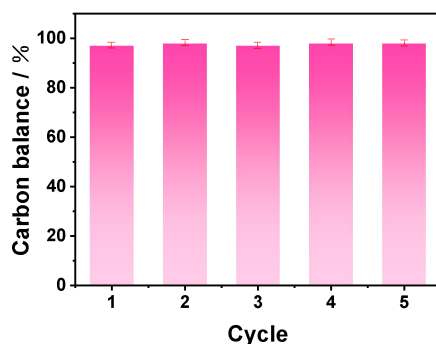

**Figure S16.** Carbon balance of FF reduction in per electrolysis cycle. Error bars represent the standard deviation of at least three independent measurements.

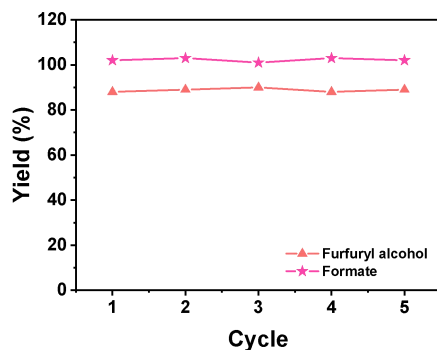

**Figure S17.** Yield of FA and formate production for five consecutive 1 h controlled-current density ( $500 \text{ mA cm}^{-2}$ ) electrolysis cycles.

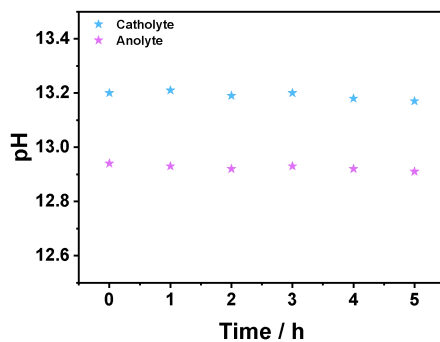

**Figure S18.** pH change of anolyte and catholyte during electrolysis in a continuous flow process. Electrolysis was performed in a two-electrode flow cell at a constant current of 500 mA using a  $\text{Cu}_3\text{Ag}_7/\text{CF}$  (anode) and  $\text{Cu}_7\text{Ag}_3/\text{CF}$  (cathode) electrocatalyst coupling. 1.0 M KOH and 0.05 M FF were used as the catholyte while 1.0 M KOH with 0.6 M HCHO as the anolyte. Flow rates of both anolyte and catholyte were set as  $50 \text{ mL min}^{-1}$ . Error bars represent the standard deviation from at least three independent measurements.

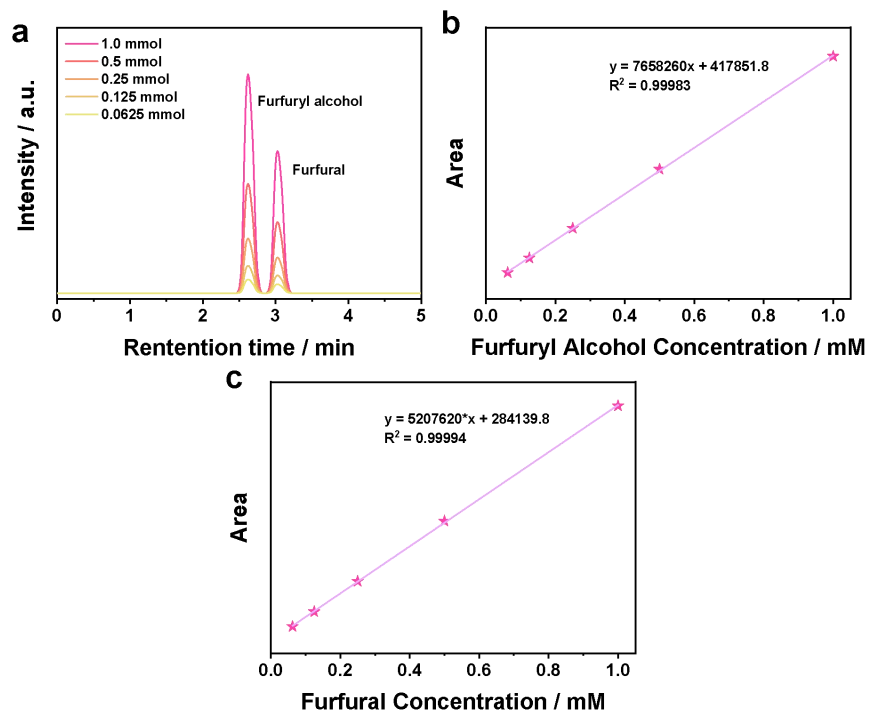

**Figure S19.** Calibration curves for the HPLC quantification of (a, b) FA and (a, c) FF.



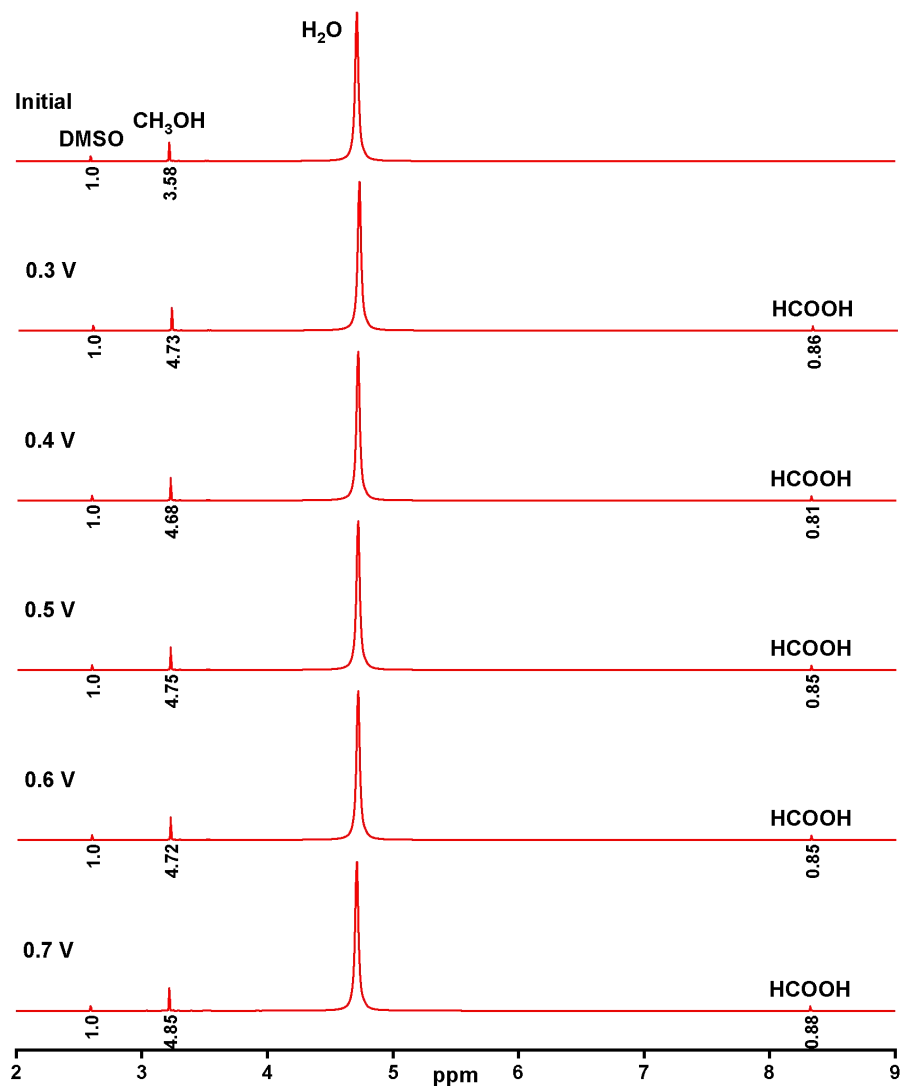

**Figure S20.** <sup>1</sup>H NMR (D<sub>2</sub>O, 400 MHz) of organic products in the liquid phase of the anode chamber in a two-electrode electrolyzer using Cu<sub>3</sub>Ag<sub>7</sub>/CF and Cu<sub>7</sub>Ag<sub>3</sub>/CF pairings, electrolyzed at different voltages.

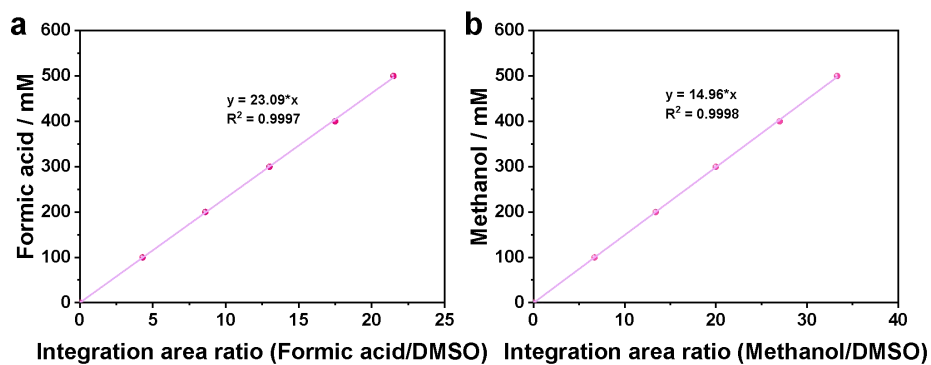

**Figure S21.** Calibration curves for the <sup>1</sup>H NMR quantification of (a) formic acid and (b) methanol using DMSO as an internal standard.

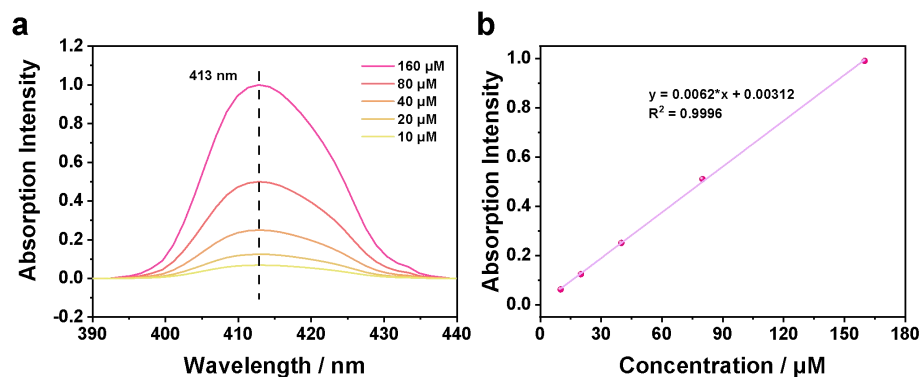

**Figure S22.** (a) UV-vis absorption spectra of the product from the reaction between acetyl acetone and HCHO of different concentrations. (b) Calibration curve obtained by plotting the HCHO concentration against absorption peak intensity at  $\lambda = 413$  nm.

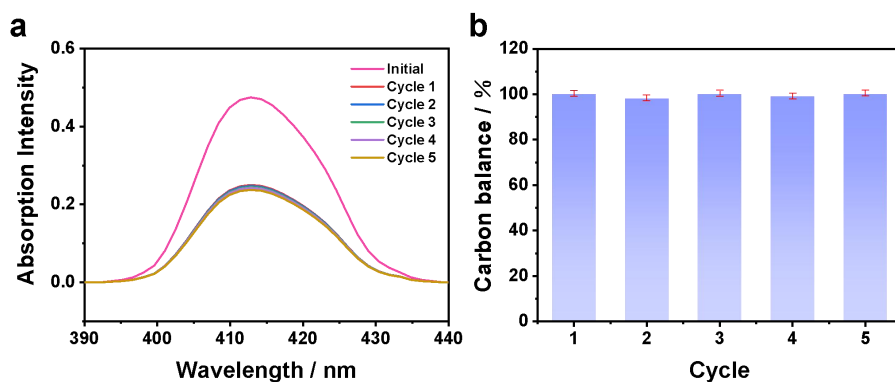

**Figure S23.** (a) UV-vis absorption spectra of the testing solution containing acetyl acetone solution and the analyte before and post per electrolysis cycle. (b) Carbon balance of HCHO oxidation in per electrolysis cycle. Error bars represent the standard deviation of at least three independent measurements.

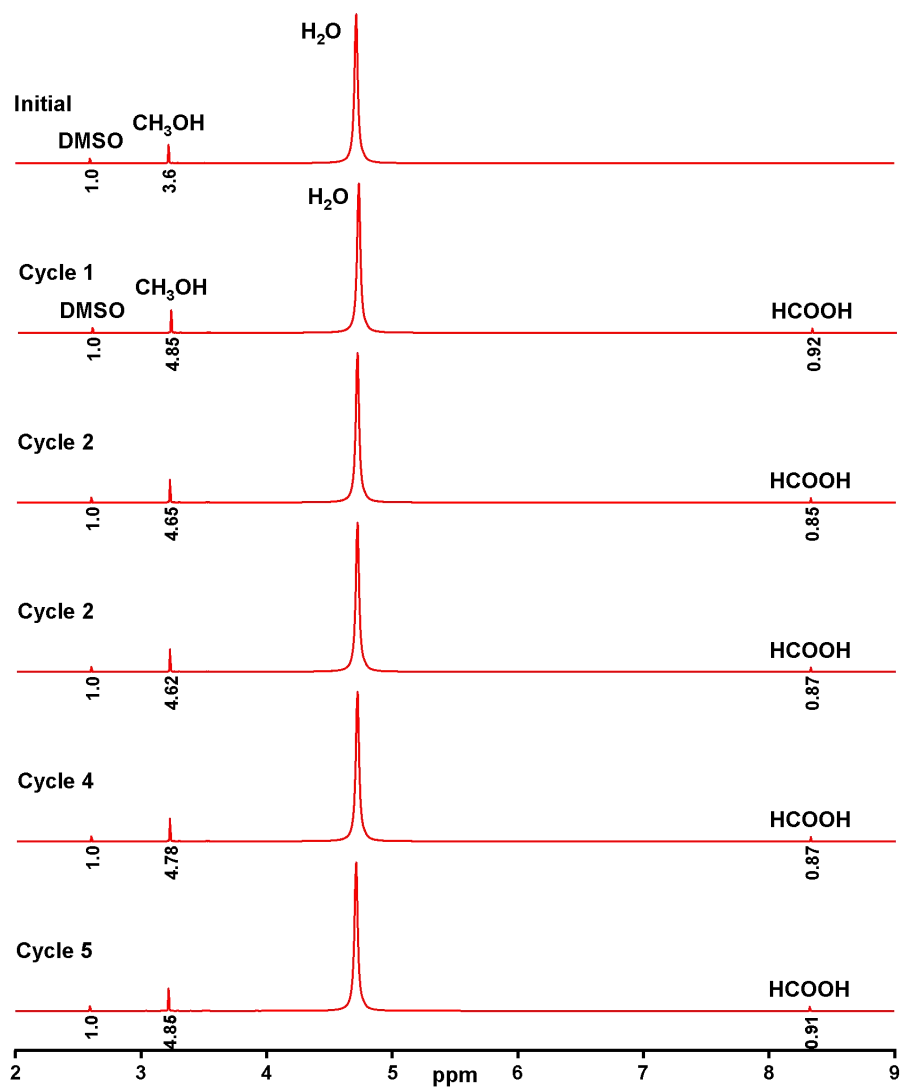

**Figure S24.** The  $^1\text{H}$  NMR (D<sub>2</sub>O, 400 MHz) of organic products in the liquid phase of the anode chamber at five consecutive 1 h controlled-current density electrolysis ( $500 \text{ mA cm}^{-2}$ ) in a two-electrode electrolyzer using the Cu<sub>3</sub>Ag<sub>7</sub>/CF and Cu<sub>7</sub>Ag<sub>3</sub>/CF couple but fresh electrolyte for each cycle.

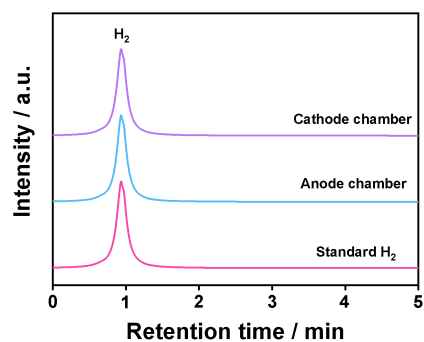

**Figure S25.** The GC of gas products collected from each cathode and anode chamber in a two-electrode electrolyzer consisting of Cu<sub>3</sub>Ag<sub>7</sub>/CF anode and Cu<sub>7</sub>Ag<sub>3</sub>/CF cathode at a cell voltage of 0.5 V, in which 1.0 M KOH and 0.05 M FF as the catholyte and 1.0 M KOH and 0.6 M HCHO as the anolyte.

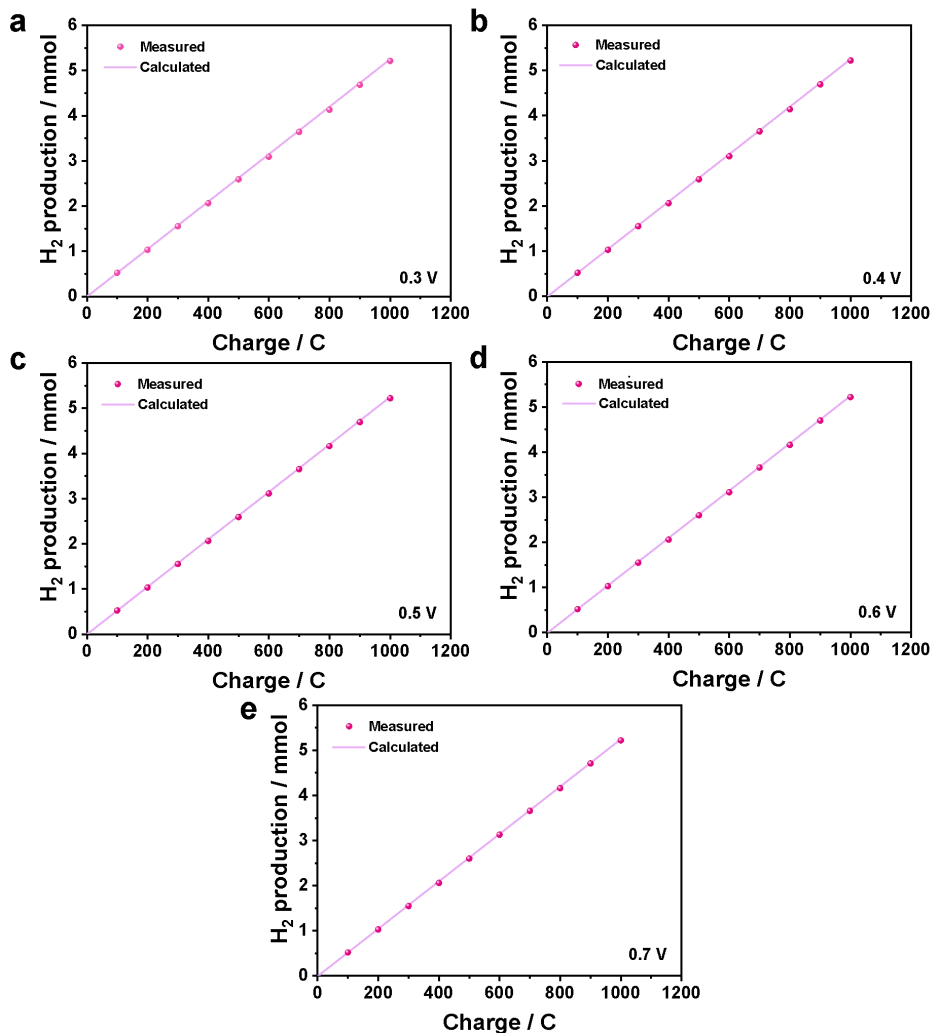

**Figure S26.** (a-e) Comparison of the experimentally measured H<sub>2</sub> amounts with the theoretical H<sub>2</sub> amounts along the passed charge for the anode chambers during each electrolysis with different voltage inputs (0.3 ~ 0.7 V) in a two-electrode electrolyzer consisting of Cu<sub>3</sub>Ag<sub>7</sub>/CF anode and Cu<sub>7</sub>Ag<sub>3</sub>/CF cathode, in which 1.0 M KOH and 0.05 M FF as the catholyte and 1.0 M KOH and 0.6 M HCHO as the anolyte.

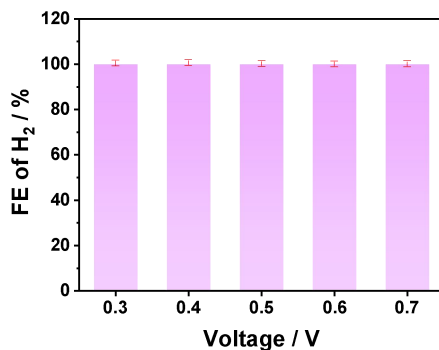

**Figure S27.** FE of H<sub>2</sub> in the anode chamber at different voltage inputs.

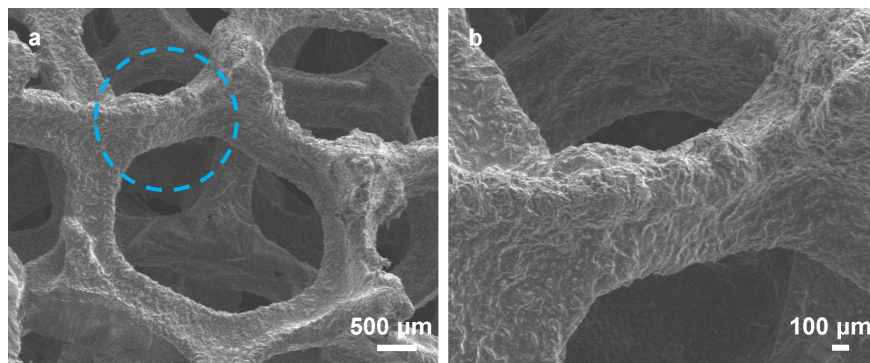

**Figure S28.** (a) (b) SEM of the  $\text{Cu}_7\text{Ag}_3/\text{CF}$  after a reaction at a cell voltage of 0.6 V in a two-electrode electrolyzer consisting of  $\text{Cu}_3\text{Ag}_7/\text{CF}$  anode and  $\text{Cu}_7\text{Ag}_3/\text{CF}$  cathode, in which 1.0 M KOH and 0.05 M FF solution as the catholyte and 1.0 M KOH and 0.6 M HCHO solution as the anolyte.

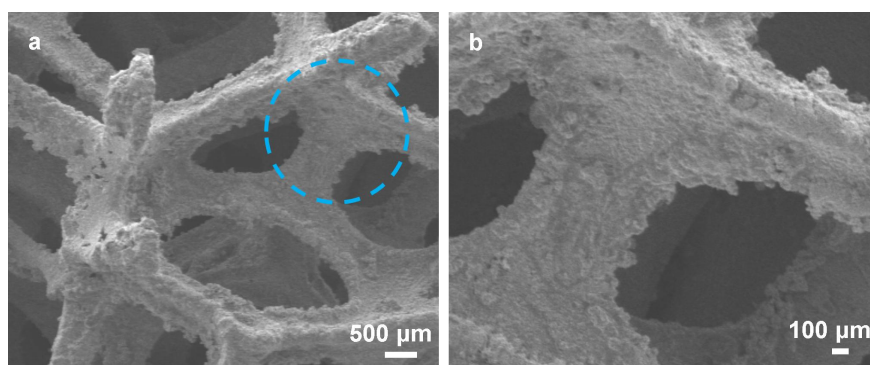

**Figure S29.** (a) (b) SEM of the  $\text{Cu}_3\text{Ag}_7/\text{CF}$  after a reaction at a cell voltage of 0.6 V in a two-electrode electrolyzer consisting of  $\text{Cu}_3\text{Ag}_7/\text{CF}$  anode and  $\text{Cu}_7\text{Ag}_3/\text{CF}$  cathode, in which 1.0 M KOH and 0.05 M FF solution as the catholyte and 1.0 M KOH and 0.6 M HCHO solution as the anolyte.

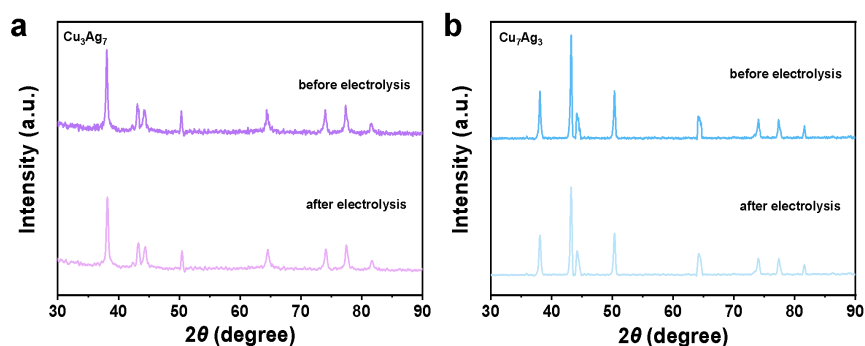

**Figure S30.** XRD patterns before and post electrolysis. (a)  $\text{Cu}_3\text{Ag}_7$ . (b)  $\text{Cu}_7\text{Ag}_3$ .

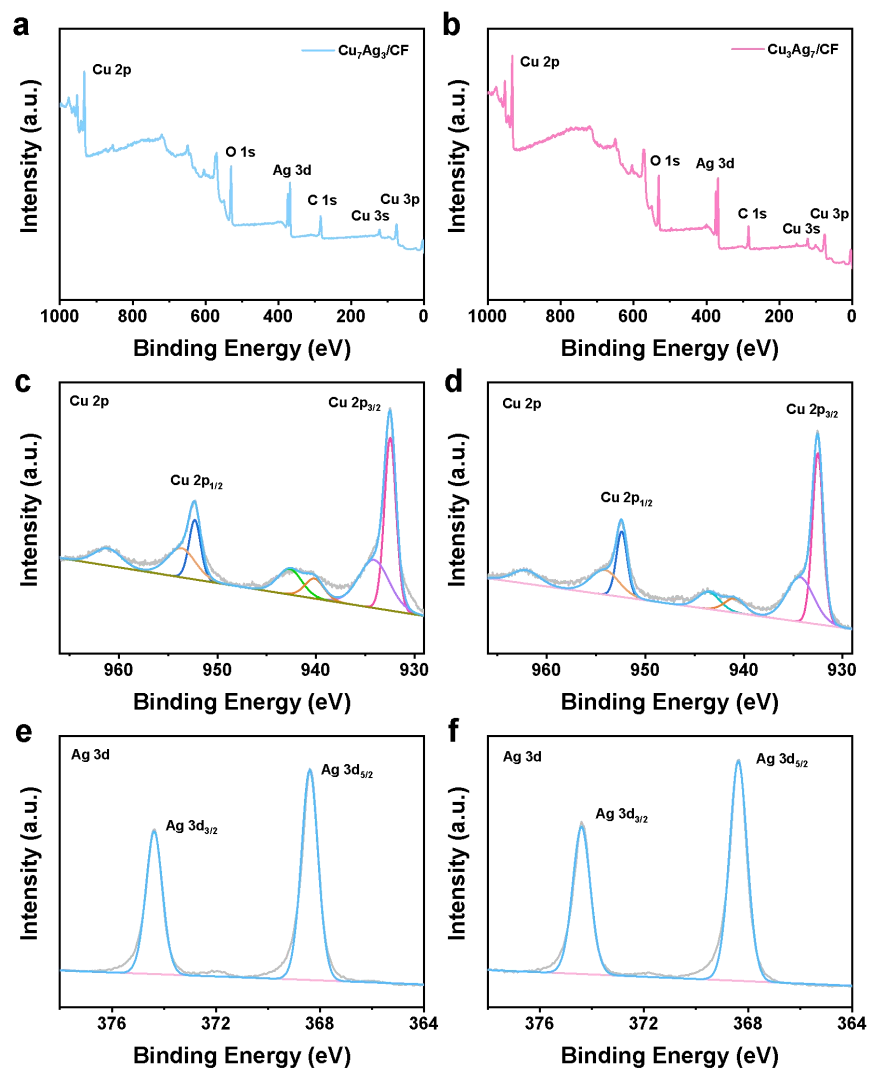

**Figure S31.** High-resolution XPS spectra of  $\text{Cu}_7\text{Ag}_3/\text{CF}$  and  $\text{Cu}_3\text{Ag}_7/\text{CF}$ . (a) XPS measurement spectrum of  $\text{Cu}_7\text{Ag}_3/\text{CF}$ . High resolution XPS spectra of  $\text{Cu}_7\text{Ag}_3/\text{CF}$  (c) Cu 2p (e) Ag 3d. (b) XPS measurement spectrum of  $\text{Cu}_3\text{Ag}_7/\text{CF}$ . High resolution XPS spectra of  $\text{Cu}_3\text{Ag}_7/\text{CF}$  (d) Cu 2p (f) Ag 3d.

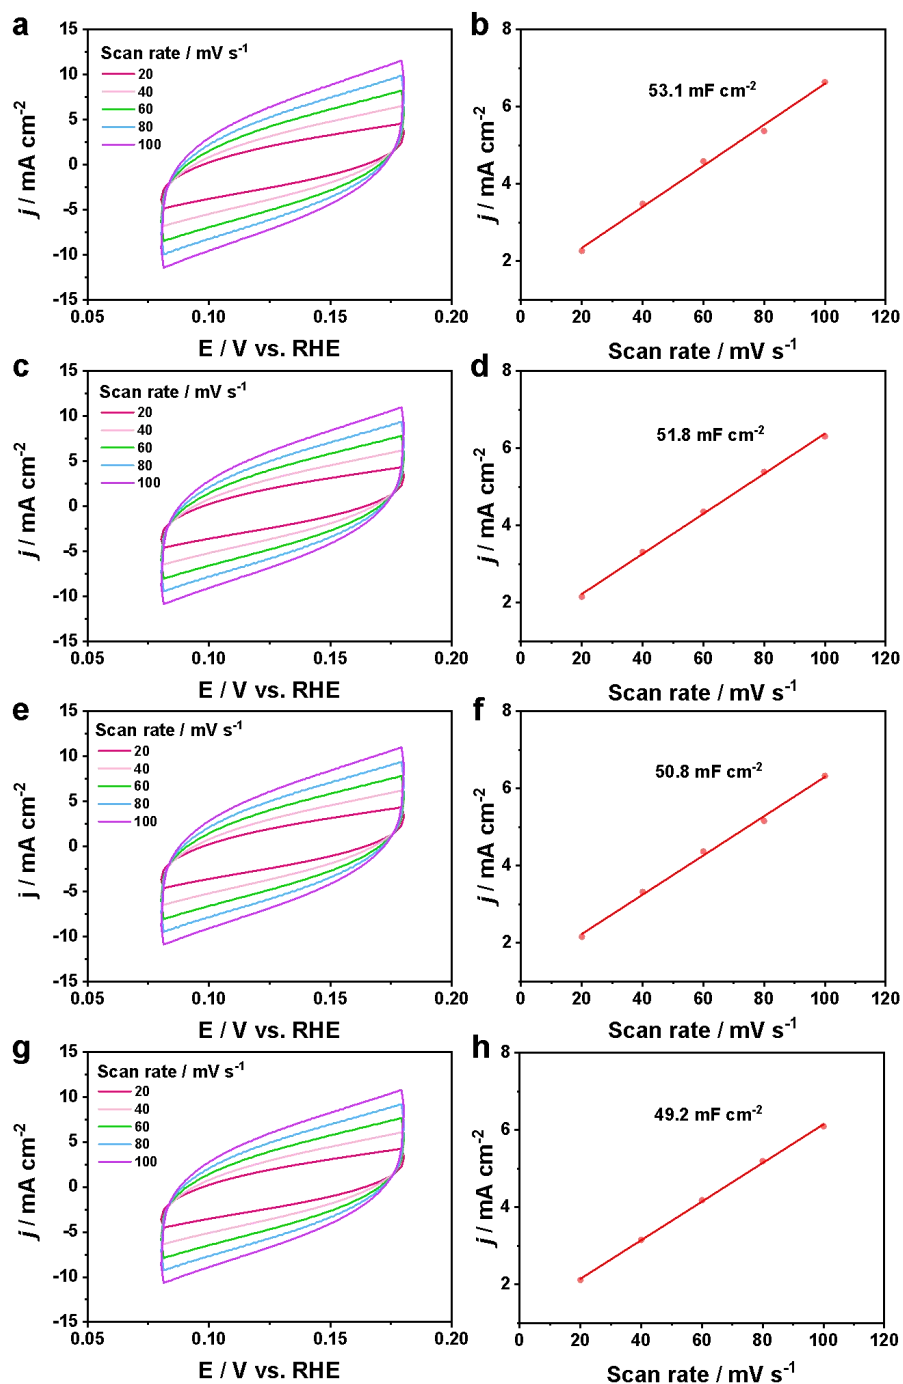

**Figure S32.** CV curves of Cu<sub>7</sub>Ag<sub>3</sub>/CF (a, c) and Cu<sub>3</sub>Ag<sub>7</sub>/CF (e, g) before and after chronoamperometric experiment were collected in a non-Faradaic region with various scan rates ranging from 20 to 100 mV s<sup>-1</sup> at potentials between 0.08 V and 0.18 V vs RHE in 1.0 M KOH solution under an Ar atmosphere.  $C_{dl}$  values of Cu<sub>7</sub>Ag<sub>3</sub>/CF electrode (b) before and (d) after chronoamperometric experiment.  $C_{dl}$  values of Cu<sub>3</sub>Ag<sub>7</sub>/CF electrode (f) before and (h) after chronoamperometric experiment.

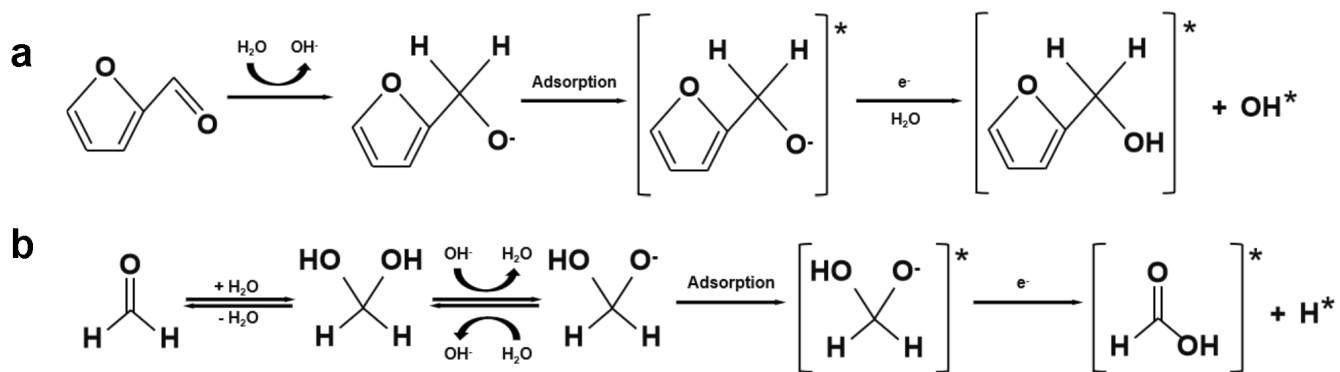

**Figure S33.** Reaction path. (a) Proposed mechanism from FF reduced to FA. (b) Proposed mechanism from HCHO oxidation to HCOOH.

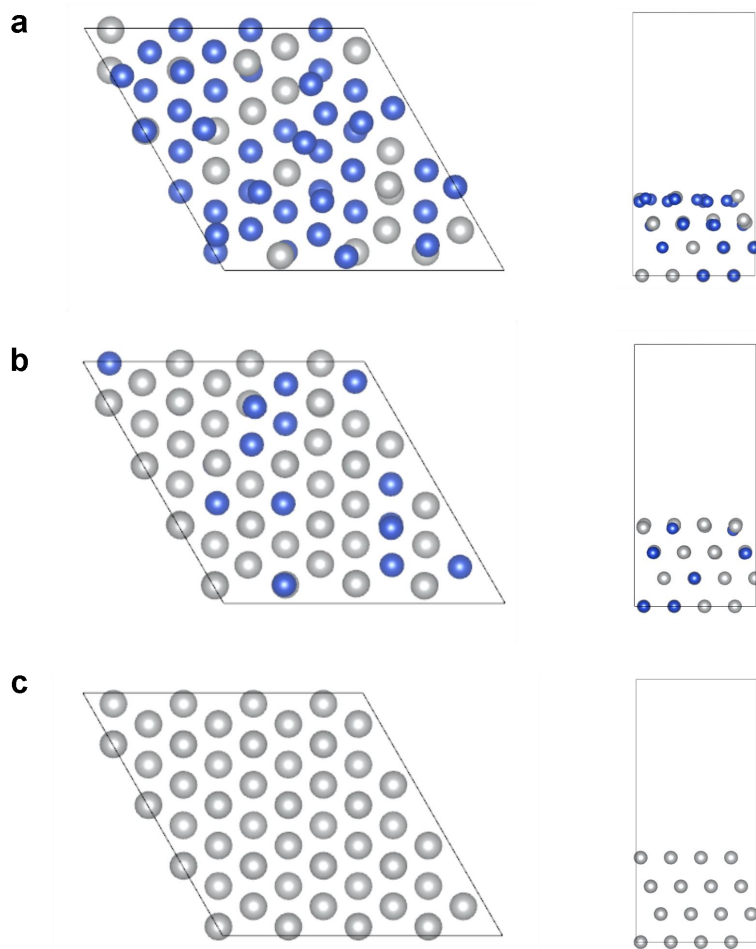

**Figure S34.** Models of the (111) surfaces of (a)  $\text{Cu}_7\text{Ag}_3$ , (b)  $\text{Cu}_3\text{Ag}_7$ , and (c) Ag (Cu is the same as model Ag, sharing the same one model).



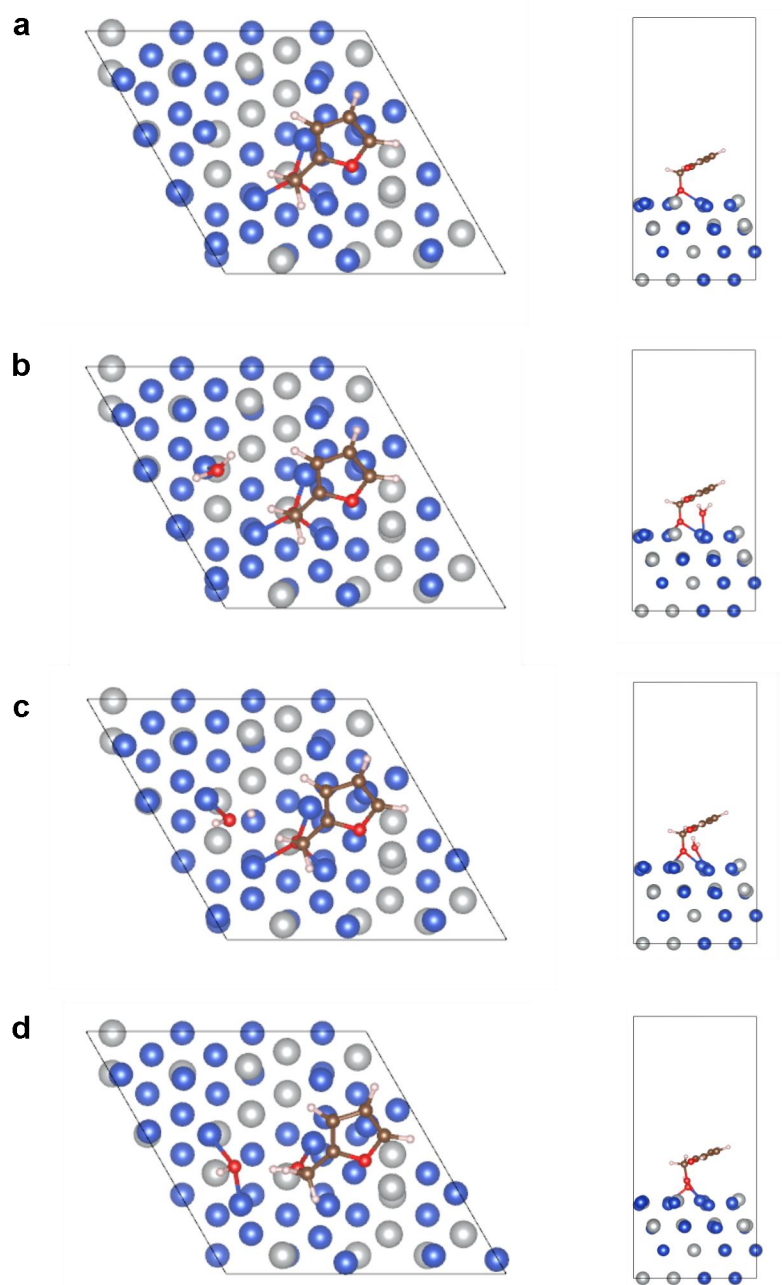

**Figure S35.** Computational models of  $\text{Cu}_7\text{Ag}_3$ . Optimized geometry of adsorbed (a)  $(\text{C}_4\text{H}_3\text{O})\text{CH}_2\text{O}$ , (b)  $(\text{C}_4\text{H}_3\text{O})\text{CH}_2\text{O}$  and  $\text{H}_2\text{O}$ , (c)  $(\text{C}_4\text{H}_3\text{O})\text{CH}_2\text{O}$  and  $\text{H}_2\text{O}$  and (d)  $(\text{C}_4\text{H}_3\text{O})\text{CH}_2\text{OH}$  and  $\text{OH}^*$  on the surface. Top view (left side) and side view (right side). (Red: O, Pink: H, Brown: C, Blue: Cu, Gray: Ag)

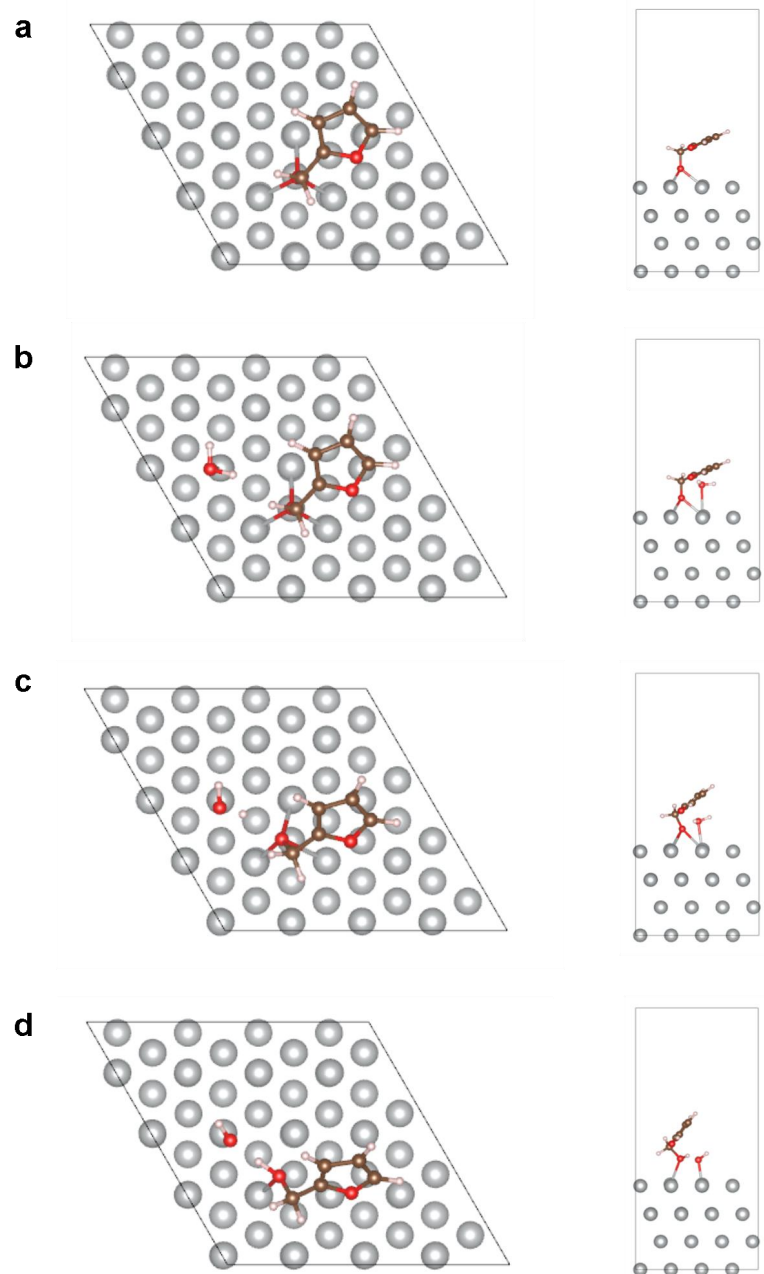

**Figure S36.** Computational models of Cu. Optimized geometry of adsorbed (a)  $(\text{C}_4\text{H}_3\text{O})\text{CH}_2\text{O}$ , (b)  $(\text{C}_4\text{H}_3\text{O})\text{CH}_2\text{O}$  and  $\text{H}_2\text{O}$ , (c)  $(\text{C}_4\text{H}_3\text{O})\text{CH}_2\text{O}$  and  $\text{H}_2\text{O}$  and (d)  $(\text{C}_4\text{H}_3\text{O})\text{CH}_2\text{OH}$  and  $\text{OH}^*$  on the surface. Top view (left side) and side view (right side). (Red: O, Pink: H, Brown: C, Gray: Cu)

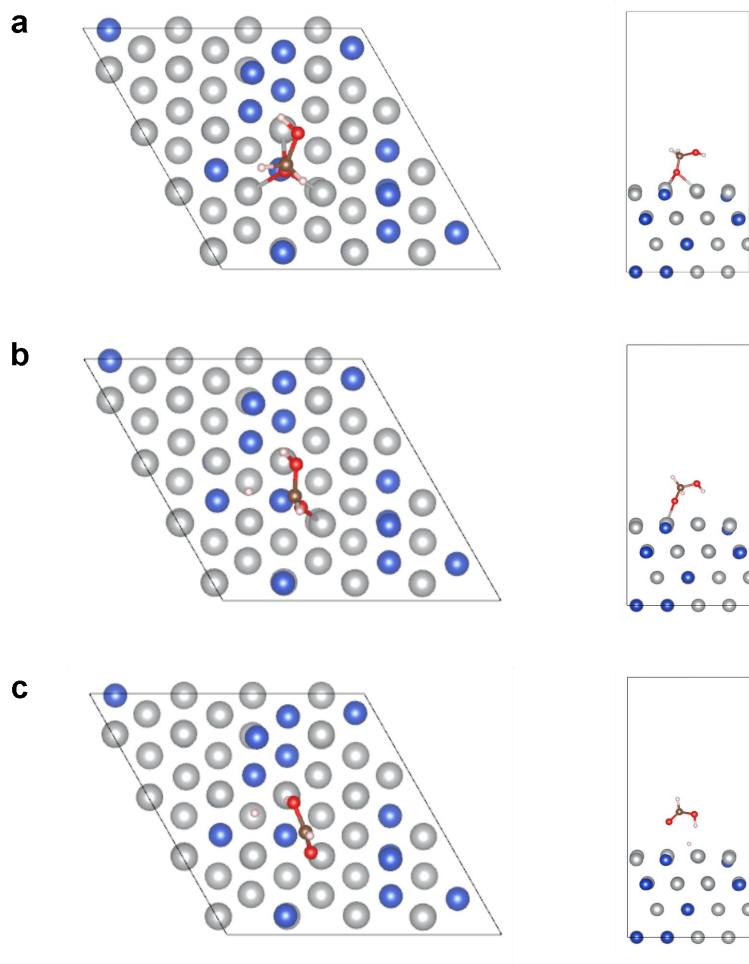

**Figure S37.** Computational models of  $\text{Cu}_3\text{Ag}_7$ . Optimized geometry of adsorbed (a)  $\text{H}_2\text{C}(\text{OH})\text{O}$ , (b)  $\text{H}_2\text{C}(\text{OH})\text{O}$  stripped of H and (c)  $\text{HCOOH}$  and  $\text{H}^*$  on the surface. Top view (left side) and side view (right side). (Red: O, Pink: H, Brown: C, Blue: Cu, Gray: Ag)

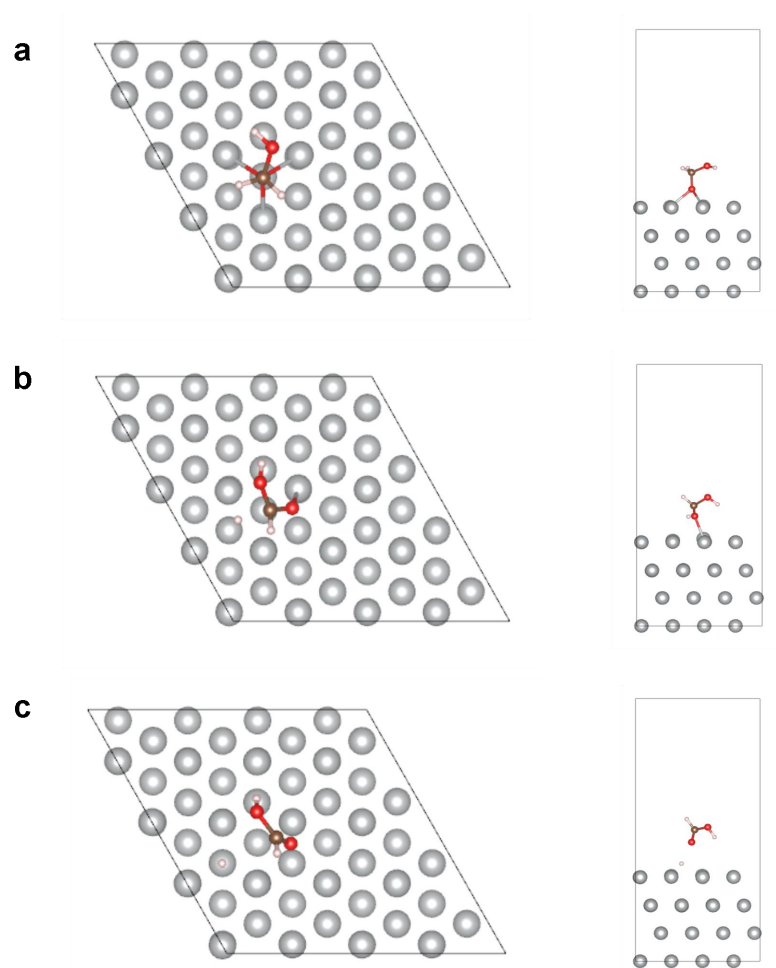

**Figure S38.** Computational models of Ag. Optimized geometry of adsorbed (a)  $\text{H}_2\text{C}(\text{OH})\text{O}$ , (b)  $\text{H}_2\text{C}(\text{OH})\text{O}$  stripped of H and (c)  $\text{HCOOH}$  and  $\text{H}^*$  on the surface. Top view (left side) and side view (right side). (Red: O, Pink: H, Brown: C, Gray: Ag)

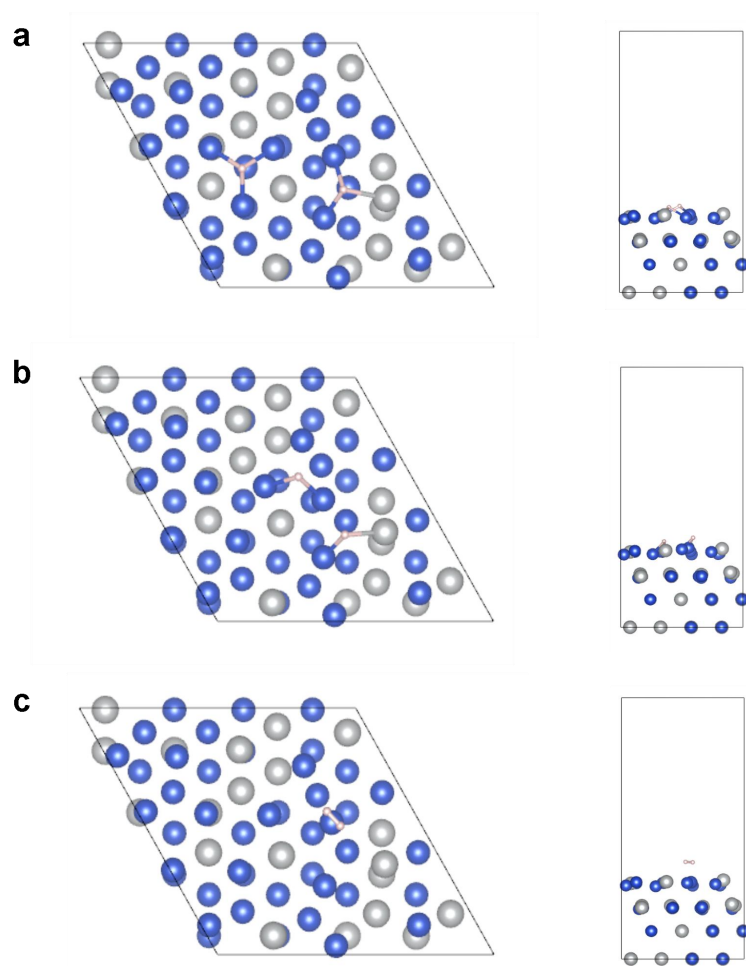

**Figure S39.** Computational models of  $\text{Cu}_7\text{Ag}_3$ . Optimized geometry of adsorbed (a)  $\text{H}^*$ , (b)  $\text{H}_2$  formation from  $\text{H}^*$  and (c)  $\text{H}_2$  on the surface. Top view (left side) and side view (right side). (Pink: H, Blue: Cu, Gray: Ag)

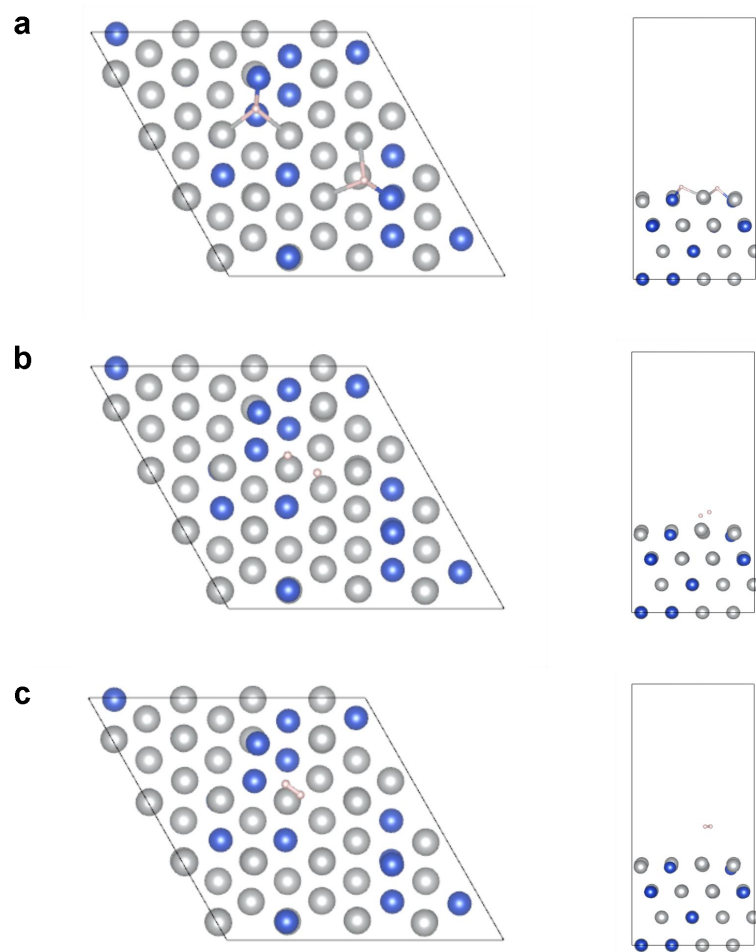

**Figure S40.** Computational models of  $\text{Cu}_3\text{Ag}_7$ . Optimized geometry of adsorbed (a)  $\text{H}^*$ , (b)  $\text{H}_2$  formation from  $\text{H}^*$  and (c)  $\text{H}_2$  on the surface. Top view (left side) and side view (right side). (Pink: H, Blue: Cu, Gray: Ag)

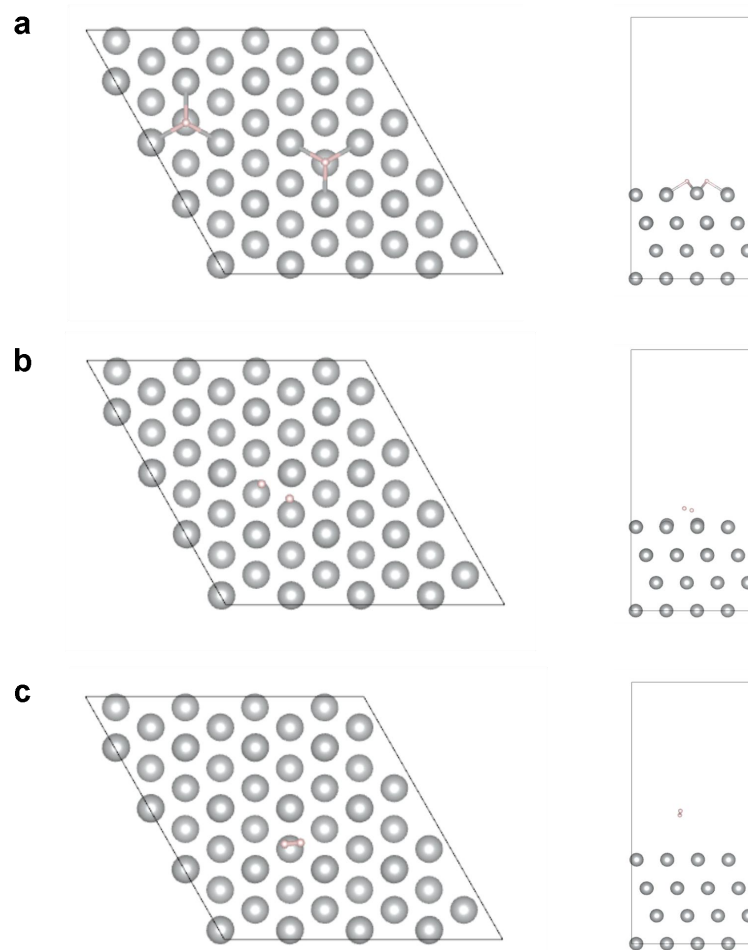

**Figure S41.** Computational models of Ag (Cu). Optimized geometry of adsorbed (a) H\*, (b) H<sub>2</sub> formation from H\* and (c) H<sub>2</sub> on the surface. Top view (left side) and side view (right side). (Pink: H, Gray: Ag (Cu))

**Table S1.** Atomic ratios of  $\text{Cu}_x\text{Ag}_y$  characterized by ICP-AES.

| Catalyst                 | Cu atom% | Ag atom% |
|--------------------------|----------|----------|
| $\text{Cu}_1\text{Ag}_9$ | 9.8      | 90.2     |
| $\text{Cu}_3\text{Ag}_7$ | 29.4     | 70.6     |
| $\text{Cu}_5\text{Ag}_5$ | 50.1     | 49.9     |
| $\text{Cu}_7\text{Ag}_3$ | 69.5     | 30.5     |
| $\text{Cu}_9\text{Ag}_1$ | 89.1     | 10.9     |

**Table S2.** Atomic ratios  $\text{Cu}_x\text{Ag}_y$  were characterized by XPS results.

| Catalyst                 | Cu atom% | Ag atom% |
|--------------------------|----------|----------|
| $\text{Cu}_1\text{Ag}_9$ | 11.2     | 88.8     |
| $\text{Cu}_3\text{Ag}_7$ | 30.6     | 69.4     |
| $\text{Cu}_5\text{Ag}_5$ | 49.3     | 50.7     |
| $\text{Cu}_7\text{Ag}_3$ | 69.9     | 30.1     |
| $\text{Cu}_9\text{Ag}_1$ | 90.4     | 9.6      |



**Table S3.** The FE of the anode products were calculated from the amount of H<sub>2</sub> and organic products at different voltages in the two-electrode electrolyzer.

| Voltage | n <sub>HCOOH</sub> (mmol)     |                                | n <sub>CH<sub>3</sub>OH</sub><br>(mmol) | n <sub>HCOO<sup>-</sup></sub><br>(mmol) | FE <sub>HCOO<sup>-</sup></sub> | n <sub>H<sub>2</sub></sub><br>(mmol) | FE <sub>H<sub>2</sub></sub> |
|---------|-------------------------------|--------------------------------|-----------------------------------------|-----------------------------------------|--------------------------------|--------------------------------------|-----------------------------|
|         | From HCHO<br>Electrooxidation | From<br>Cannizzaro<br>reaction | From<br>Cannizzaro<br>reaction          |                                         |                                |                                      |                             |
| 0.3 V   | 4.98                          | 2.98                           | 2.98                                    | 5.01                                    | 100%                           | 2.49                                 | 100%                        |
| 0.4 V   | 5.05                          | 3.15                           | 3.15                                    | 5.09                                    | 100%                           | 2.53                                 | 100%                        |
| 0.5 V   | 5.01                          | 2.86                           | 2.86                                    | 5.02                                    | 100%                           | 2.50                                 | 100%                        |
| 0.6 V   | 5.06                          | 3.23                           | 3.23                                    | 5.12                                    | 100%                           | 2.55                                 | 100%                        |
| 0.7 V   | 5.10                          | 3.18                           | 3.18                                    | 5.15                                    | 100%                           | 2.57                                 | 100%                        |

**\*Condition:** Electrolysis was carried out in a two-electrode electrolyzer using Cu<sub>3</sub>Ag<sub>7</sub>/CF and Cu<sub>7</sub>Ag<sub>3</sub>/CF pairs at different voltages, with a new electrolyte at each voltage, where 1.0 M KOH and 0.05 M FF were used as the cathodic solution and 1.0 M KOH and 0.6 M HCHO were used as the anodic solution.

**Table S4.** The FE of anodic products and carbon balance based on the amounts of H<sub>2</sub> and organic products during each electrolysis in a two-electrode electrolyzer.

| Entry   | n <sub>HCOOH</sub> (mmol)             |                                | n <sub>CH<sub>3</sub>OH</sub><br>(mmol) | n <sub>HCOO<sup>-</sup></sub><br>(mmol) | FE <sub>HCOO<sup>-</sup></sub> | n <sub>H<sub>2</sub></sub><br>(mmol) | FE <sub>H<sub>2</sub></sub> | n <sub>HCHO</sub><br>(mmol) | Carbon<br>balance |
|---------|---------------------------------------|--------------------------------|-----------------------------------------|-----------------------------------------|--------------------------------|--------------------------------------|-----------------------------|-----------------------------|-------------------|
|         | From<br>HCHO<br>Electro-<br>oxidation | From<br>Cannizzaro<br>reaction | From<br>Cannizzaro<br>reaction          |                                         |                                |                                      |                             |                             |                   |
| Cycle 1 | 5.18                                  | 3.12                           | 3.12                                    | 5.18                                    | 100%                           | 5.20                                 | 200%                        | 16.52                       | 100%              |
| Cycle 2 | 5.12                                  | 3.06                           | 3.06                                    | 5.10                                    | 100%                           | 5.10                                 | 200%                        | 16.40                       | 98%               |
| Cycle 3 | 5.10                                  | 28.6                           | 28.6                                    | 5.09                                    | 100%                           | 5.10                                 | 200%                        | 16.32                       | 97%               |
| Cycle 4 | 5.01                                  | 3.58                           | 3.58                                    | 5.02                                    | 100%                           | 5.05                                 | 200%                        | 16.42                       | 100%              |
| Cycle 5 | 4.89                                  | 3.33                           | 3.33                                    | 4.9                                     | 100%                           | 5.00                                 | 200%                        | 16.61                       | 100%              |

**\*Condition:** Five consecutive 1 h controlled-current density electrolysis (500 mA cm<sup>-2</sup>) were carried out in a two-electrode electrolyzer using Cu<sub>3</sub>Ag<sub>7</sub>/CF and Cu<sub>7</sub>Ag<sub>3</sub>/CF pairings, with fresh electrolyte used for each cycle, where 1.0 M KOH and 0.05 M FF were the cathodic solution, and 1.0 M KOH and 0.6 M HCHO were the cathodic solution.

**Table S5.** Assignments of the vibration bands observed on the in-situ FTIR spectra in 1.0 M KOH and 0.05 M FF recorded on Cu<sub>7</sub>Ag<sub>3</sub>/CF.

| Vibration band (cm <sup>-1</sup> ) |          | Compound | Assignment                                                                       |
|------------------------------------|----------|----------|----------------------------------------------------------------------------------|
| Positive                           | Negative |          |                                                                                  |
| 1684                               |          | FF       | C=O stretching                                                                   |
| 1670                               |          | FF       | C=O stretching                                                                   |
| 1566                               |          | FF       | C=C of furan cycle stretching                                                    |
| 1475                               |          | FF       | C=C stretching, furan ring bending                                               |
| 1393                               |          | FF       | CH aldehyde bending, C=O stretching                                              |
| 1277                               |          | FF       | C-O stretching, C-C aldehyde stretching, furan ring bending, CH aldehyde bending |
|                                    | 1502     | FA       | Furan ring C=C stretching                                                        |
|                                    | 1217     | FA       | Furan ring stretching, C-O stretching, ring-CH <sub>2</sub> stretching           |
|                                    | 1144     | FA       | Furan ring, collective vibration                                                 |
|                                    | 1006     | FA       | Furan ring stretching, CH ring bending                                           |
|                                    | 967      | FA       | Furan ring, collective vibration                                                 |

**Table S6.** A comparison of electrolysis performance of inorganic and organic feedstocks electrooxidation integrated with electroreduction in two-electrodes electrolyzer.

| Oxidation substrates | Reduction Substrate          | Catalysts                                                                          | product                                           | Current density (mA cm <sup>-2</sup> ) | Cell voltage (V) | Ref.      |
|----------------------|------------------------------|------------------------------------------------------------------------------------|---------------------------------------------------|----------------------------------------|------------------|-----------|
| HCHO                 | Furfural                     | Cu <sub>3</sub> Ag <sub>7</sub> /CF(+)  <br>Cu <sub>7</sub> Ag <sub>3</sub> /CF(-) | Furfuryl alcohol,<br>Formate, H <sub>2</sub>      | 500                                    | 0.5              | This work |
| HCHO                 | H <sub>2</sub> O             | Cu <sub>3</sub> Ag <sub>7</sub> /CF(+)  <br>Ni <sub>3</sub> N/Ni/NF(-)             | Formate, H <sub>2</sub>                           | 500                                    | 0.6              | 1         |
| HMF                  | CO <sub>2</sub>              | InOOH-O <sub>v</sub><br>(+, -)                                                     | FDCA, HCOOH                                       | 10                                     | 2.27             | 2         |
| H <sub>2</sub> O     | CO <sub>2</sub>              | Zn/SnO <sub>2</sub><br>(+, -)                                                      | H <sub>2</sub> O <sub>2</sub> , HCOO <sup>-</sup> | 100                                    | 3.8              | 3         |
| HCHO                 | NO <sub>3</sub> <sup>-</sup> | Cu <sub>2</sub> O(+, -)                                                            | HCOOH, NH <sub>4</sub> <sup>+</sup>               | 10                                     | 0.56             | 4         |
| Cellulose            | H <sub>2</sub> O             | H <sub>6</sub> [PV <sub>3</sub> Mo <sub>9</sub> O <sub>40</sub> ]<br>(+)  Pt(-)    | Formic acid, H <sub>2</sub>                       | 50                                     | 1.22             | 5         |
| Glucose              | H <sub>2</sub> O             | NiFeO <sub>x</sub> -NF(+)  NiFe<br>N <sub>x</sub> -NF(-)                           | Glucaric acid, H <sub>2</sub>                     | 200                                    | 1.48             | 6         |
| Na <sub>2</sub> S    | H <sub>2</sub> O             | CoS <sub>2</sub> @C/MXene/N<br>F(+)  CoO@C/MXe<br>ne/NF (-)                        | Sulfur, H <sub>2</sub>                            | 300                                    | 0.97             | 7         |
| 1,3-propanediol      | H <sub>2</sub> O             | PdBi/NF(+)  Pt(-)                                                                  | 3-Hydroxypropionic acid, H <sub>2</sub>           | 20                                     | 0.86             | 8         |
| Glycerol             | H <sub>2</sub> O             | NiCo <sub>2</sub> O <sub>4</sub> /NF(+)  <br>Ni(-)                                 | Formate, H <sub>2</sub>                           | 10                                     | 1.35             | 9         |

## References

- 1 G. Li, G. Han, L. Wang, X. Cui, N. K. Moehring, P. R. Kidambi, D.-e. Jiang and Y. Sun, *Nat. Commun.*, 2023, **14**, 525.
- 2 F. Ye, S. Zhang, Q. Cheng, Y. Long, D. Liu, R. Paul, Y. Fang, Y. Su, L. Qu, L. Dai and C. Hu, *Nat. Commun.*, 2023, **14**, 2040.
- 3 X. Hu, G. Mei, X. Chen, J. Liu, B. Y. Xia and B. You, *Angew. Chem. Int. Ed.*, 2023, **62**, e202304050.
- 4 L. Xiao, W. Dai, S. Mou, X. Wang, Q. Cheng and F. Dong, *Energy Environ. Sci.*, 2023, **16**, 2696-2704.
- 5 W. Tang, L. Zhang, T. Qiu, H. Tan, Y. Wang, W. Liu and Y. Li, *Angew. Chem. Int. Ed.*, 2023, **62**, e202305843.
- 6 W. Liu, Z. Xu, D. Zhao, X. Pan, H. Li, X. Hu, Z. Fan, W. Wang, G. Zhao, S. Jin, G. W. Huber and H. Yu, *Nat. Commun.*, 2020, **11**, 265.
- 7 L. Zhang, Z. Wang and J. Qiu, *Adv. Mater.*, 2022, **34**, 2109321.
- 8 D. Si, M. Wang, X. Yang, C. Wang, K. Shi, B. Huang, L. Chen and J. Shi, *Appl. Catal. B Environ.*, 2023, **331**, 122664.
- 9 G. Wu, X. Dong, J. Mao, G. Li, C. Zhu, S. Li, A. Chen, G. Feng, Y. Song, W. Chen and W. Wei, *Chem. Eng. J.*, 2023, **468**, 143640.
